# Supplementary material
Source: ML conference proceedings conference paper supplement (https://proceedings.neurips.cc/paper_files/paper/2022/hash/361e5112d2eca09513bbd266e4b2d2be-Abstract.html)
Supplement: Supplementary file 1 [file 361e5112d2eca09513bbd266e4b2d2be-Supplemental-Conference.zip]

Archive with 1,206 entries (820 files):
- supplementary/
- __MACOSX/._supplementary
- supplementary/code/
- __MACOSX/supplementary/._code
- supplementary/README.md
- __MACOSX/supplementary/._README.md
- supplementary/appendix.pdf
- __MACOSX/supplementary/._appendix.pdf
- supplementary/results/
- __MACOSX/supplementary/._results
- supplementary/code/environment.yml
- __MACOSX/supplementary/code/._environment.yml
- supplementary/code/__init__.py
- __MACOSX/supplementary/code/.___init__.py
- supplementary/code/masked_autoencoding/
- __MACOSX/supplementary/code/._masked_autoencoding
- supplementary/code/image_classification/
- __MACOSX/supplementary/code/._image_classification
- supplementary/results/CA results/
- __MACOSX/supplementary/results/._CA results
- supplementary/results/non-CA results/
- __MACOSX/supplementary/results/._non-CA results
- supplementary/code/masked_autoencoding/__init__.py
- __MACOSX/supplementary/code/masked_autoencoding/.___init__.py
- supplementary/code/masked_autoencoding/test.py
- __MACOSX/supplementary/code/masked_autoencoding/._test.py
- supplementary/code/masked_autoencoding/train.py
- __MACOSX/supplementary/code/masked_autoencoding/._train.py
- supplementary/code/masked_autoencoding/inference.py
- __MACOSX/supplementary/code/masked_autoencoding/._inference.py
- supplementary/code/masked_autoencoding/conf/
- __MACOSX/supplementary/code/masked_autoencoding/._conf
- supplementary/code/masked_autoencoding/src/
- __MACOSX/supplementary/code/masked_autoencoding/._src
- supplementary/code/image_classification/__init__.py
- __MACOSX/supplementary/code/image_classification/.___init__.py
- supplementary/code/image_classification/train.py
- __MACOSX/supplementary/code/image_classification/._train.py
- supplementary/code/image_classification/conf/
- __MACOSX/supplementary/code/image_classification/._conf
- supplementary/code/image_classification/src/
- __MACOSX/supplementary/code/image_classification/._src
- supplementary/results/CA results/input change adapt/
- __MACOSX/supplementary/results/CA results/._input change adapt
- supplementary/results/CA results/complete masking/
- __MACOSX/supplementary/results/CA results/._complete masking
- supplementary/results/CA results/spatial interpolation/
- __MACOSX/supplementary/results/CA results/._spatial interpolation
- supplementary/results/CA results/convergence stability/
- __MACOSX/supplementary/results/CA results/._convergence stability
- supplementary/results/CA results/attn head masking/
- __MACOSX/supplementary/results/CA results/._attn head masking
- supplementary/results/CA results/noise generalization/
- __MACOSX/supplementary/results/CA results/._noise generalization
- supplementary/results/CA results/damage resilience/
- __MACOSX/supplementary/results/CA results/._damage resilience
- supplementary/results/CA results/no masking/
- __MACOSX/supplementary/results/CA results/._no masking
- supplementary/results/CA results/update rate adapt/
- __MACOSX/supplementary/results/CA results/._update rate adapt
- supplementary/results/CA results/hidden state viz/
- __MACOSX/supplementary/results/CA results/._hidden state viz
- supplementary/results/non-CA results/unet/
- __MACOSX/supplementary/results/non-CA results/._unet
- supplementary/results/non-CA results/vit/
- __MACOSX/supplementary/results/non-CA results/._vit
- supplementary/code/masked_autoencoding/conf/test_config.yaml
- __MACOSX/supplementary/code/masked_autoencoding/conf/._test_config.yaml
- supplementary/code/masked_autoencoding/conf/inference_config.yaml
- __MACOSX/supplementary/code/masked_autoencoding/conf/._inference_config.yaml
- supplementary/code/masked_autoencoding/conf/dataset/
- __MACOSX/supplementary/code/masked_autoencoding/conf/._dataset
- supplementary/code/masked_autoencoding/conf/model/
- __MACOSX/supplementary/code/masked_autoencoding/conf/._model
- supplementary/code/masked_autoencoding/conf/experiment/
- __MACOSX/supplementary/code/masked_autoencoding/conf/._experiment
- supplementary/code/masked_autoencoding/conf/train_config.yaml
- __MACOSX/supplementary/code/masked_autoencoding/conf/._train_config.yaml
- supplementary/code/masked_autoencoding/src/datasets.py
- __MACOSX/supplementary/code/masked_autoencoding/src/._datasets.py
- supplementary/code/masked_autoencoding/src/__init__.py
- __MACOSX/supplementary/code/masked_autoencoding/src/.___init__.py
- supplementary/code/masked_autoencoding/src/models/
- __MACOSX/supplementary/code/masked_autoencoding/src/._models
- supplementary/code/masked_autoencoding/src/utils.py
- __MACOSX/supplementary/code/masked_autoencoding/src/._utils.py
- supplementary/code/masked_autoencoding/src/deq/
- __MACOSX/supplementary/code/masked_autoencoding/src/._deq
- supplementary/code/masked_autoencoding/src/losses.py
- __MACOSX/supplementary/code/masked_autoencoding/src/._losses.py
- supplementary/code/masked_autoencoding/src/model_and_trainer.py
- __MACOSX/supplementary/code/masked_autoencoding/src/._model_and_trainer.py
- supplementary/code/image_classification/conf/pretrained_model/
- __MACOSX/supplementary/code/image_classification/conf/._pretrained_model
- supplementary/code/image_classification/conf/dataset/
- __MACOSX/supplementary/code/image_classification/conf/._dataset
- supplementary/code/image_classification/conf/classifier/
- __MACOSX/supplementary/code/image_classification/conf/._classifier
- supplementary/code/image_classification/conf/experiment/
- __MACOSX/supplementary/code/image_classification/conf/._experiment
- supplementary/code/image_classification/conf/train_config.yaml
- __MACOSX/supplementary/code/image_classification/conf/._train_config.yaml
- supplementary/code/image_classification/src/__init__.py
- __MACOSX/supplementary/code/image_classification/src/.___init__.py
- supplementary/code/image_classification/src/utils.py
- __MACOSX/supplementary/code/image_classification/src/._utils.py
- supplementary/code/image_classification/src/losses.py
- __MACOSX/supplementary/code/image_classification/src/._losses.py
- supplementary/code/image_classification/src/classifiers/
- __MACOSX/supplementary/code/image_classification/src/._classifiers
- supplementary/code/image_classification/src/samplers.py
- __MACOSX/supplementary/code/image_classification/src/._samplers.py
- supplementary/code/image_classification/src/model_and_trainer.py
- __MACOSX/supplementary/code/image_classification/src/._model_and_trainer.py
- supplementary/results/CA results/input change adapt/vitca/
- __MACOSX/supplementary/results/CA results/input change adapt/._vitca
- supplementary/results/CA results/input change adapt/unetca/
- __MACOSX/supplementary/results/CA results/input change adapt/._unetca
- supplementary/results/CA results/complete masking/vitca/
- __MACOSX/supplementary/results/CA results/complete masking/._vitca
- supplementary/results/CA results/complete masking/unetca/
- __MACOSX/supplementary/results/CA results/complete masking/._unetca
- supplementary/results/CA results/spatial interpolation/vitca/
- __MACOSX/supplementary/results/CA results/spatial interpolation/._vitca
- supplementary/results/CA results/convergence stability/vitca/
- __MACOSX/supplementary/results/CA results/convergence stability/._vitca
- supplementary/results/CA results/convergence stability/unetca/
- __MACOSX/supplementary/results/CA results/convergence stability/._unetca
- supplementary/results/CA results/attn head masking/vitca/
- __MACOSX/supplementary/results/CA results/attn head masking/._vitca
- supplementary/results/CA results/noise generalization/vitca/
- __MACOSX/supplementary/results/CA results/noise generalization/._vitca
- supplementary/results/CA results/noise generalization/unetca/
- __MACOSX/supplementary/results/CA results/noise generalization/._unetca
- supplementary/results/CA results/damage resilience/vitca/
- __MACOSX/supplementary/results/CA results/damage resilience/._vitca
- supplementary/results/CA results/damage resilience/unetca/
- __MACOSX/supplementary/results/CA results/damage resilience/._unetca
- supplementary/results/CA results/no masking/vitca/
- __MACOSX/supplementary/results/CA results/no masking/._vitca
- supplementary/results/CA results/no masking/unetca/
- __MACOSX/supplementary/results/CA results/no masking/._unetca
- supplementary/results/CA results/update rate adapt/vitca/
- __MACOSX/supplementary/results/CA results/update rate adapt/._vitca
- supplementary/results/CA results/update rate adapt/unetca/
- __MACOSX/supplementary/results/CA results/update rate adapt/._unetca
- supplementary/results/CA results/hidden state viz/vitca/
- __MACOSX/supplementary/results/CA results/hidden state viz/._vitca
- supplementary/results/non-CA results/unet/mnist/
- __MACOSX/supplementary/results/non-CA results/unet/._mnist
- supplementary/results/non-CA results/unet/fashionmnist/
- __MACOSX/supplementary/results/non-CA results/unet/._fashionmnist
- supplementary/results/non-CA results/unet/landcoverrep/
- __MACOSX/supplementary/results/non-CA results/unet/._landcoverrep
- supplementary/results/non-CA results/unet/tinyimagenet/
- __MACOSX/supplementary/results/non-CA results/unet/._tinyimagenet
- supplementary/results/non-CA results/unet/celeba/
- __MACOSX/supplementary/results/non-CA results/unet/._celeba
- supplementary/results/non-CA results/unet/cifar10/
- __MACOSX/supplementary/results/non-CA results/unet/._cifar10
- supplementary/results/non-CA results/vit/mnist/
- __MACOSX/supplementary/results/non-CA results/vit/._mnist
- supplementary/results/non-CA results/vit/fashionmnist/
- __MACOSX/supplementary/results/non-CA results/vit/._fashionmnist
- supplementary/results/non-CA results/vit/landcoverrep/
- __MACOSX/supplementary/results/non-CA results/vit/._landcoverrep
- supplementary/results/non-CA results/vit/tinyimagenet/
- __MACOSX/supplementary/results/non-CA results/vit/._tinyimagenet
- supplementary/results/non-CA results/vit/celeba/
- __MACOSX/supplementary/results/non-CA results/vit/._celeba
- supplementary/results/non-CA results/vit/cifar10/
- __MACOSX/supplementary/results/non-CA results/vit/._cifar10
- supplementary/code/masked_autoencoding/conf/dataset/mnist.yaml
- __MACOSX/supplementary/code/masked_autoencoding/conf/dataset/._mnist.yaml
- supplementary/code/masked_autoencoding/conf/dataset/landcoverrep.yaml
- __MACOSX/supplementary/code/masked_autoencoding/conf/dataset/._landcoverrep.yaml
- supplementary/code/masked_autoencoding/conf/dataset/fashionmnist.yaml
- __MACOSX/supplementary/code/masked_autoencoding/conf/dataset/._fashionmnist.yaml
- supplementary/code/masked_autoencoding/conf/dataset/cifar10.yaml
- __MACOSX/supplementary/code/masked_autoencoding/conf/dataset/._cifar10.yaml
- supplementary/code/masked_autoencoding/conf/dataset/celeba.yaml
- __MACOSX/supplementary/code/masked_autoencoding/conf/dataset/._celeba.yaml
- supplementary/code/masked_autoencoding/conf/dataset/tinyimagenet.yaml
- __MACOSX/supplementary/code/masked_autoencoding/conf/dataset/._tinyimagenet.yaml
- supplementary/code/masked_autoencoding/conf/model/vitca_learned_pe.yaml
- __MACOSX/supplementary/code/masked_autoencoding/conf/model/._vitca_learned_pe.yaml
- supplementary/code/masked_autoencoding/conf/model/tnca.yaml
- __MACOSX/supplementary/code/masked_autoencoding/conf/model/._tnca.yaml
- supplementary/code/masked_autoencoding/conf/model/vitca.yaml
- __MACOSX/supplementary/code/masked_autoencoding/conf/model/._vitca.yaml
- supplementary/code/masked_autoencoding/conf/model/unetca.yaml
- __MACOSX/supplementary/code/masked_autoencoding/conf/model/._unetca.yaml
- supplementary/code/masked_autoencoding/conf/model/vitca_inv_heads16.yaml
- __MACOSX/supplementary/code/masked_autoencoding/conf/model/._vitca_inv_heads16.yaml
- supplementary/code/masked_autoencoding/conf/model/unet.yaml
- __MACOSX/supplementary/code/masked_autoencoding/conf/model/._unet.yaml
- supplementary/code/masked_autoencoding/conf/model/vitca_sincos5xy.yaml
- __MACOSX/supplementary/code/masked_autoencoding/conf/model/._vitca_sincos5xy.yaml
- supplementary/code/masked_autoencoding/conf/model/vitca_inv_xy.yaml
- __MACOSX/supplementary/code/masked_autoencoding/conf/model/._vitca_inv_xy.yaml
- supplementary/code/masked_autoencoding/conf/model/vitca_dynattn.yaml
- __MACOSX/supplementary/code/masked_autoencoding/conf/model/._vitca_dynattn.yaml
- supplementary/code/masked_autoencoding/conf/model/vit.yaml
- __MACOSX/supplementary/code/masked_autoencoding/conf/model/._vit.yaml
- supplementary/code/masked_autoencoding/conf/model/vitca_no_pe.yaml
- __MACOSX/supplementary/code/masked_autoencoding/conf/model/._vitca_no_pe.yaml
- supplementary/code/masked_autoencoding/conf/model/vitca_deq.yaml
- __MACOSX/supplementary/code/masked_autoencoding/conf/model/._vitca_deq.yaml
- supplementary/code/masked_autoencoding/conf/model/vitca_heads32_xy.yaml
- __MACOSX/supplementary/code/masked_autoencoding/conf/model/._vitca_heads32_xy.yaml
- supplementary/code/masked_autoencoding/conf/model/vitca_inv_heads16_xy.yaml
- __MACOSX/supplementary/code/masked_autoencoding/conf/model/._vitca_inv_heads16_xy.yaml
- supplementary/code/masked_autoencoding/conf/model/vitca_xy.yaml
- __MACOSX/supplementary/code/masked_autoencoding/conf/model/._vitca_xy.yaml
- supplementary/code/masked_autoencoding/conf/model/vitca_sincos5.yaml
- __MACOSX/supplementary/code/masked_autoencoding/conf/model/._vitca_sincos5.yaml
- supplementary/code/masked_autoencoding/conf/model/vitca_heads32.yaml
- __MACOSX/supplementary/code/masked_autoencoding/conf/model/._vitca_heads32.yaml
- supplementary/code/masked_autoencoding/conf/model/vitca_inv.yaml
- __MACOSX/supplementary/code/masked_autoencoding/conf/model/._vitca_inv.yaml
- supplementary/code/masked_autoencoding/conf/experiment/mnist.yaml
- __MACOSX/supplementary/code/masked_autoencoding/conf/experiment/._mnist.yaml
- supplementary/code/masked_autoencoding/conf/experiment/fashionmnist.yaml
- __MACOSX/supplementary/code/masked_autoencoding/conf/experiment/._fashionmnist.yaml
- supplementary/code/masked_autoencoding/conf/experiment/cifar10.yaml
- __MACOSX/supplementary/code/masked_autoencoding/conf/experiment/._cifar10.yaml
- supplementary/code/masked_autoencoding/conf/experiment/tinyimagenet.yaml
- __MACOSX/supplementary/code/masked_autoencoding/conf/experiment/._tinyimagenet.yaml
- supplementary/code/masked_autoencoding/conf/experiment/celeba_small.yaml
- __MACOSX/supplementary/code/masked_autoencoding/conf/experiment/._celeba_small.yaml
- supplementary/code/masked_autoencoding/conf/experiment/landcoverrep_small.yaml
- __MACOSX/supplementary/code/masked_autoencoding/conf/experiment/._landcoverrep_small.yaml
- supplementary/code/masked_autoencoding/src/models/unetca.py
- __MACOSX/supplementary/code/masked_autoencoding/src/models/._unetca.py
- supplementary/code/masked_autoencoding/src/models/vitca.py
- __MACOSX/supplementary/code/masked_autoencoding/src/models/._vitca.py
- supplementary/code/masked_autoencoding/src/models/unet.py
- __MACOSX/supplementary/code/masked_autoencoding/src/models/._unet.py
- supplementary/code/masked_autoencoding/src/models/__init__.py
- __MACOSX/supplementary/code/masked_autoencoding/src/models/.___init__.py
- supplementary/code/masked_autoencoding/src/models/vitca_dynattn.py
- __MACOSX/supplementary/code/masked_autoencoding/src/models/._vitca_dynattn.py
- supplementary/code/masked_autoencoding/src/models/vit.py
- __MACOSX/supplementary/code/masked_autoencoding/src/models/._vit.py
- supplementary/code/masked_autoencoding/src/models/tnca.py
- __MACOSX/supplementary/code/masked_autoencoding/src/models/._tnca.py
- supplementary/code/masked_autoencoding/src/models/vitca_deq.py
- __MACOSX/supplementary/code/masked_autoencoding/src/models/._vitca_deq.py
- supplementary/code/masked_autoencoding/src/deq/__init__.py
- __MACOSX/supplementary/code/masked_autoencoding/src/deq/.___init__.py
- supplementary/code/masked_autoencoding/src/deq/solvers.py
- __MACOSX/supplementary/code/masked_autoencoding/src/deq/._solvers.py
- supplementary/code/masked_autoencoding/src/deq/grad.py
- __MACOSX/supplementary/code/masked_autoencoding/src/deq/._grad.py
- supplementary/code/image_classification/conf/pretrained_model/vitca.yaml
- __MACOSX/supplementary/code/image_classification/conf/pretrained_model/._vitca.yaml
- supplementary/code/image_classification/conf/pretrained_model/unetca.yaml
- __MACOSX/supplementary/code/image_classification/conf/pretrained_model/._unetca.yaml
- supplementary/code/image_classification/conf/pretrained_model/vitca_inv_heads16.yaml
- __MACOSX/supplementary/code/image_classification/conf/pretrained_model/._vitca_inv_heads16.yaml
- supplementary/code/image_classification/conf/pretrained_model/unet.yaml
- __MACOSX/supplementary/code/image_classification/conf/pretrained_model/._unet.yaml
- supplementary/code/image_classification/conf/pretrained_model/vitca_inv_xy.yaml
- __MACOSX/supplementary/code/image_classification/conf/pretrained_model/._vitca_inv_xy.yaml
- supplementary/code/image_classification/conf/pretrained_model/vit.yaml
- __MACOSX/supplementary/code/image_classification/conf/pretrained_model/._vit.yaml
- supplementary/code/image_classification/conf/pretrained_model/vitca_heads32_xy.yaml
- __MACOSX/supplementary/code/image_classification/conf/pretrained_model/._vitca_heads32_xy.yaml
- supplementary/code/image_classification/conf/pretrained_model/vitca_inv_heads16_xy.yaml
- __MACOSX/supplementary/code/image_classification/conf/pretrained_model/._vitca_inv_heads16_xy.yaml
- supplementary/code/image_classification/conf/pretrained_model/vitca_heads32.yaml
- __MACOSX/supplementary/code/image_classification/conf/pretrained_model/._vitca_heads32.yaml
- supplementary/code/image_classification/conf/pretrained_model/vitca_inv.yaml
- __MACOSX/supplementary/code/image_classification/conf/pretrained_model/._vitca_inv.yaml
- supplementary/code/image_classification/conf/dataset/mnist.yaml
- __MACOSX/supplementary/code/image_classification/conf/dataset/._mnist.yaml
- supplementary/code/image_classification/conf/dataset/fashionmnist.yaml
- __MACOSX/supplementary/code/image_classification/conf/dataset/._fashionmnist.yaml
- supplementary/code/image_classification/conf/dataset/cifar10.yaml
- __MACOSX/supplementary/code/image_classification/conf/dataset/._cifar10.yaml
- supplementary/code/image_classification/conf/dataset/tinyimagenet.yaml
- __MACOSX/supplementary/code/image_classification/conf/dataset/._tinyimagenet.yaml
- supplementary/code/image_classification/conf/classifier/nonlinear.yaml
- __MACOSX/supplementary/code/image_classification/conf/classifier/._nonlinear.yaml
- supplementary/code/image_classification/conf/classifier/linear.yaml
- __MACOSX/supplementary/code/image_classification/conf/classifier/._linear.yaml
- supplementary/code/image_classification/conf/experiment/mnist.yaml
- __MACOSX/supplementary/code/image_classification/conf/experiment/._mnist.yaml
- supplementary/code/image_classification/conf/experiment/fashionmnist.yaml
- __MACOSX/supplementary/code/image_classification/conf/experiment/._fashionmnist.yaml
- supplementary/code/image_classification/conf/experiment/cifar10.yaml
- __MACOSX/supplementary/code/image_classification/conf/experiment/._cifar10.yaml
- supplementary/code/image_classification/conf/experiment/tinyimagenet.yaml
- __MACOSX/supplementary/code/image_classification/conf/experiment/._tinyimagenet.yaml
- supplementary/code/image_classification/src/classifiers/nonlinear.py
- __MACOSX/supplementary/code/image_classification/src/classifiers/._nonlinear.py
- supplementary/code/image_classification/src/classifiers/linear.py
- __MACOSX/supplementary/code/image_classification/src/classifiers/._linear.py
- supplementary/code/image_classification/src/classifiers/__init__.py
- __MACOSX/supplementary/code/image_classification/src/classifiers/.___init__.py
[truncated: 906 more entries]
