# Supplementary material
Source: ML conference proceedings conference paper supplement (https://proceedings.neurips.cc/paper_files/paper/2022/hash/361e5112d2eca09513bbd266e4b2d2be-Abstract.html)
Supplement: Supplementary file 1 [file 361e5112d2eca09513bbd266e4b2d2be-Supplemental-Conference.zip › supplementary/code/environment.yml]

name: pytorch1.10
channels:
  - pytorch
  - nvidia
  - conda-forge
  - defaults
dependencies:
  - _libgcc_mutex=0.1=main
  - absl-py=0.13.0=py38h06a4308_0
  - aiohttp=3.7.4=py38h27cfd23_1
  - antlr-python-runtime=4.8=py38h32f6830_2
  - argh=0.26.2=pyh9f0ad1d_1002
  - astroid=2.6.6=py38h06a4308_0
  - async-timeout=3.0.1=py38h06a4308_0
  - attrs=21.2.0=pyhd3eb1b0_0
  - black=21.10b0=pyhd8ed1ab_0
  - blas=1.0=mkl
  - blessings=1.7=py38h06a4308_1002
  - blinker=1.4=py38h06a4308_0
  - bottleneck=1.3.2=py38heb32a55_1
  - brotlipy=0.7.0=py38h27cfd23_1003
  - bzip2=1.0.8=h7b6447c_0
  - c-ares=1.17.1=h27cfd23_0
  - ca-certificates=2021.10.8=ha878542_0
  - cachetools=4.2.2=pyhd3eb1b0_0
  - certifi=2021.10.8=py38h578d9bd_1
  - cffi=1.14.6=py38h400218f_0
  - cfgv=3.3.1=pyhd8ed1ab_0
  - chardet=3.0.4=py38h06a4308_1003
  - click=8.0.1=pyhd3eb1b0_0
  - colorama=0.4.4=pyhd3eb1b0_0
  - conda-package-handling=1.7.3=py38h27cfd23_1
  - configparser=5.2.0=pyhd8ed1ab_0
  - coverage=5.5=py38h27cfd23_2
  - cryptography=3.4.7=py38hd23ed53_0
  - cudatoolkit=11.1.74=h6bb024c_0
  - cycler=0.10.0=py38_0
  - cython=0.29.24=py38h295c915_0
  - decorator=4.4.2=pyhd3eb1b0_0
  - dill=0.3.4=pyhd8ed1ab_0
  - distlib=0.3.4=pyhd8ed1ab_0
  - docker-pycreds=0.4.0=py_0
  - editdistance=0.5.3=py38h950e882_2
  - ffmpeg=4.2.2=h20bf706_0
  - freetype=2.10.4=h5ab3b9f_0
  - gitdb=4.0.9=pyhd8ed1ab_0
  - gitpython=3.1.26=pyhd8ed1ab_0
  - gmp=6.2.1=h2531618_2
  - gnutls=3.6.15=he1e5248_0
  - google-auth=1.33.0=pyhd3eb1b0_0
  - google-auth-oauthlib=0.4.1=py_2
  - gpustat=0.6.0=pyhd3eb1b0_1
  - gql=0.1.0=py_0
  - graphql-core=3.2.0=pyhd8ed1ab_0
  - grpcio=1.36.1=py38h2157cd5_1
  - hydra-core=1.1.1=pyhd8ed1ab_0
  - icu=58.2=he6710b0_3
  - identify=2.1.4=pyhd8ed1ab_0
  - idna=2.10=pyhd3eb1b0_0
  - imageio=2.9.0=pyhd3eb1b0_0
  - imageio-ffmpeg=0.4.4=pyhd8ed1ab_0
  - importlib-metadata=3.10.0=py38h06a4308_0
  - importlib_resources=5.4.0=pyhd8ed1ab_0
  - intel-openmp=2021.3.0=h06a4308_3350
  - isort=5.9.2=pyhd3eb1b0_0
  - jpeg=9b=h024ee3a_2
  - kiwisolver=1.3.1=py38h2531618_0
  - lame=3.100=h7b6447c_0
  - lazy-object-proxy=1.6.0=py38h27cfd23_0
  - lcms2=2.12=h3be6417_0
  - ld_impl_linux-64=2.35.1=h7274673_9
  - libffi=3.3=he6710b0_2
  - libgcc-ng=9.1.0=hdf63c60_0
  - libgfortran-ng=7.3.0=hdf63c60_0
  - libidn2=2.3.2=h7f8727e_0
  - libopus=1.3.1=h7b6447c_0
  - libpng=1.6.37=hbc83047_0
  - libprotobuf=3.17.2=h4ff587b_1
  - libstdcxx-ng=9.1.0=hdf63c60_0
  - libtasn1=4.16.0=h27cfd23_0
  - libtiff=4.2.0=h85742a9_0
  - libunistring=0.9.10=h27cfd23_0
  - libuv=1.40.0=h7b6447c_0
  - libvpx=1.7.0=h439df22_0
  - libwebp-base=1.2.0=h27cfd23_0
  - lz4-c=1.9.3=h295c915_1
  - markdown=3.3.4=py38h06a4308_0
  - mccabe=0.6.1=py38_1
  - mkl=2020.2=256
  - mkl-service=2.3.0=py38he904b0f_0
  - mkl_fft=1.3.0=py38h54f3939_0
  - mkl_random=1.1.1=py38h0573a6f_0
  - moviepy=1.0.1=py_0
  - multidict=5.1.0=py38h27cfd23_2
  - mypy_extensions=0.4.3=py38h06a4308_1
  - ncurses=6.2=he6710b0_1
  - nettle=3.7.3=hbbd107a_1
  - ninja=1.10.2=hff7bd54_1
  - nodeenv=1.6.0=pyhd8ed1ab_0
  - numexpr=2.7.3=py38hb2eb853_0
  - numpy=1.19.2=py38h54aff64_0
  - numpy-base=1.19.2=py38hfa32c7d_0
  - nvidia-ml=7.352.0=pyhd3eb1b0_0
  - oauthlib=3.1.1=pyhd3eb1b0_0
  - olefile=0.46=py_0
  - omegaconf=2.1.1=py38h578d9bd_1
  - openh264=2.1.0=hd408876_0
  - openjpeg=2.3.0=h05c96fa_1
  - openssl=1.1.1n=h7f8727e_0
  - packaging=21.3=pyhd8ed1ab_0
  - pandas=1.3.1=py38h8c16a72_0
  - pathspec=0.9.0=pyhd8ed1ab_0
  - pathtools=0.1.2=py_1
  - pillow=8.3.1=py38h2c7a002_0
  - pip=21.2.2=py38h06a4308_0
  - platformdirs=2.4.0=pyhd3eb1b0_0
  - pre-commit=2.17.0=py38h578d9bd_0
  - proglog=0.1.9=py_0
  - promise=2.3=py38h578d9bd_5
  - psutil=5.8.0=py38h27cfd23_1
  - pyasn1=0.4.8=py_0
  - pyasn1-modules=0.2.8=py_0
  - pycosat=0.6.3=py38h7b6447c_1
  - pycparser=2.20=py_2
  - pyjwt=2.1.0=py38h06a4308_0
  - pylint=2.9.6=py38h06a4308_1
  - pyopenssl=20.0.1=pyhd3eb1b0_1
  - pyparsing=2.4.7=pyhd3eb1b0_0
  - pysocks=1.7.1=py38h06a4308_0
  - python=3.8.11=h12debd9_0_cpython
  - python-dateutil=2.8.2=pyhd3eb1b0_0
  - python_abi=3.8=2_cp38
  - pytorch=1.10.0=py3.8_cuda11.1_cudnn8.0.5_0
  - pytorch-mutex=1.0=cuda
  - pytz=2021.1=pyhd3eb1b0_0
  - pyyaml=5.3.1=py38h8df0ef7_1
  - readline=8.1=h27cfd23_0
  - regex=2021.11.2=py38h7f8727e_0
  - requests=2.25.1=pyhd3eb1b0_0
  - requests-oauthlib=1.3.0=py_0
  - rsa=4.7.2=pyhd3eb1b0_1
  - ruamel_yaml=0.15.100=py38h27cfd23_0
  - scipy=1.6.2=py38h91f5cce_0
  - seaborn=0.11.1=pyhd3eb1b0_0
  - sentry-sdk=1.5.5=pyhd8ed1ab_0
  - shortuuid=1.0.8=py38h578d9bd_0
  - six=1.16.0=pyhd3eb1b0_0
  - smmap=3.0.5=pyh44b312d_0
  - sqlite=3.36.0=hc218d9a_0
  - subprocess32=3.5.4=py_1
  - tensorboard=2.5.0=py_0
  - tensorboard-plugin-wit=1.6.0=py_0
  - tensorboardx=2.4=pyhd8ed1ab_0
  - termcolor=1.1.0=py38h06a4308_1
  - tk=8.6.10=hbc83047_0
  - toml=0.10.2=pyhd3eb1b0_0
  - tomli=1.2.2=pyhd3eb1b0_0
  - torchaudio=0.10.0=py38_cu111
  - torchvision=0.11.1=py38_cu111
  - tornado=6.1=py38h27cfd23_0
  - tqdm=4.62.0=pyhd3eb1b0_1
  - typed-ast=1.4.3=py38h7f8727e_1
  - typing-extensions=3.10.0.0=hd3eb1b0_0
  - typing_extensions=3.10.0.0=pyh06a4308_0
  - urllib3=1.26.6=pyhd3eb1b0_1
  - virtualenv=20.13.2=py38h578d9bd_0
  - watchdog=0.10.4=py38h578d9bd_0
  - werkzeug=1.0.1=pyhd3eb1b0_0
  - wheel=0.36.2=pyhd3eb1b0_0
  - wrapt=1.12.1=py38h7b6447c_1
  - x264=1!157.20191217=h7b6447c_0
  - xz=5.2.5=h7b6447c_0
  - yaml=0.2.5=h7b6447c_0
  - yarl=1.6.3=py38h27cfd23_0
  - zipp=3.5.0=pyhd3eb1b0_0
  - zlib=1.2.11=h7b6447c_3
  - zstd=1.4.9=haebb681_0
  - pip:
    - affine==2.3.0
    - albumentations==1.1.0
    - alembic==1.6.5
    - appdirs==1.4.4
    - argon2-cffi==21.3.0
    - argon2-cffi-bindings==21.2.0
    - asttokens==2.0.5
    - autopage==0.5.0
    - backcall==0.2.0
    - bayesian-optimization==1.2.0
    - beautifulsoup4==4.10.0
    - bleach==5.0.0
    - click-plugins==1.1.1
    - cliff==3.10.1
    - cligj==0.7.2
    - cloudpickle==2.0.0
    - cma==3.1.0
    - cmaes==0.8.2
    - cmd2==2.4.0
    - colorlog==6.6.0
    - dataclasses==0.6
    - debugpy==1.6.0
    - defusedxml==0.7.1
    - efficientnet-pytorch==0.6.3
    - einops==0.4.1
    - entrypoints==0.4
    - executing==0.8.3
    - falcon==3.1.0
    - falcon-cors==1.1.7
    - fastjsonschema==2.15.3
    - filelock==3.4.2
    - fiona==1.8.21
    - fonttools==4.32.0
    - fsspec==2022.2.0
    - future==0.18.2
    - gdown==4.2.1
    - greenlet==1.1.2
    - gunicorn==20.1.0
    - hydra-colorlog==1.1.0
    - hydra-nevergrad-sweeper==1.1.5
    - hydra-optuna-sweeper==1.1.2
    - hydra-orion-sweeper==1.0.0
    - hydra-submitit-launcher==1.1.6
    - iniconfig==1.1.1
    - ipykernel==6.13.0
    - ipympl==0.9.0
    - ipython==8.2.0
    - ipython-genutils==0.2.0
    - ipywidgets==7.7.0
    - jedi==0.18.1
    - jinja2==3.1.1
    - joblib==1.1.0
    - jsonschema==4.4.0
    - jupyter-client==7.2.2
    - jupyter-core==4.10.0
    - jupyterlab-pygments==0.2.2
    - jupyterlab-widgets==1.1.0
    - kaleido==0.2.1
    - kornia==0.6.4
    - lpips==0.1.4
    - mako==1.2.0
    - markupsafe==2.1.1
    - matplotlib==3.5.1
    - matplotlib-inline==0.1.3
    - mistune==0.8.4
    - munch==2.5.0
    - nbclient==0.6.0
    - nbconvert==6.5.0
    - nbformat==5.3.0
    - nest-asyncio==1.5.5
    - networkx==2.7.1
    - nevergrad==0.4.3.post9
    - notebook==6.4.11
    - opencv-python-headless==4.5.5.64
    - optuna==2.10.0
    - orion==0.2.3
    - pandocfilters==1.5.0
    - parso==0.8.3
    - pbr==5.8.1
    - pexpect==4.8.0
    - pickleshare==0.7.5
    - plotly==5.6.0
    - pluggy==1.0.0
    - pretrainedmodels==0.7.4
    - prettytable==3.2.0
    - prometheus-client==0.14.1
    - prompt-toolkit==3.0.29
    - protobuf==3.17.3
    - ptyprocess==0.7.0
    - pure-eval==0.2.2
    - py==1.11.0
    - pydeprecate==0.3.1
    - pygments==2.11.2
    - pymongo==4.1.0
    - pyperclip==1.8.2
    - pyproj==3.3.0
    - pyrsistent==0.18.1
    - pytest==7.1.1
    - python-editor==1.0.4
    - pytorch-lightning==1.5.10
    - pywavelets==1.3.0
    - pyzmq==22.3.0
    - qudida==0.0.4
    - rasterio==1.2.10
    - rtree==0.9.7
    - scikit-image==0.19.2
    - scikit-learn==1.0.2
    - segmentation-models-pytorch==0.2.1
    - send2trash==1.8.0
    - setproctitle==1.2.2
    - setuptools==59.5.0
    - shapely==1.8.1.post1
    - snuggs==1.4.7
    - soupsieve==2.3.1
    - sqlalchemy==1.4.34
    - stack-data==0.2.0
    - stevedore==3.5.0
    - submitit==1.4.1
    - tabulate==0.8.9
    - tenacity==8.0.1
    - tensorboard-data-server==0.6.1
    - terminado==0.13.3
    - threadpoolctl==3.1.0
    - tifffile==2022.3.16
    - timm==0.4.12
    - tinycss2==1.1.1
    - torch-tb-profiler==0.3.1
    - torchgeo==0.2.1
    - torchmetrics==0.7.2
    - traitlets==5.1.1
    - wandb==0.12.11
    - wcwidth==0.2.5
    - webencodings==0.5.1
    - widgetsnbextension==3.6.0
    - yaspin==2.1.0
prefix: ./envs/pytorch1.10
