# Supplementary material
Source: ML conference proceedings conference paper supplement (https://proceedings.neurips.cc/paper_files/paper/2022/hash/361e5112d2eca09513bbd266e4b2d2be-Abstract.html)
Supplement: Supplementary file 1 [file 361e5112d2eca09513bbd266e4b2d2be-Supplemental-Conference.zip › supplementary/code/image_classification/conf/classifier/nonlinear.yaml]

_target_: image_classification.src.classifiers.nonlinear.NonLinear

in_chns: 3
hidden_chns: 32
num_classes: 10
