# Supplementary material
Source: ML conference proceedings conference paper supplement (https://proceedings.neurips.cc/paper_files/paper/2022/hash/361e5112d2eca09513bbd266e4b2d2be-Abstract.html)
Supplement: Supplementary file 1 [file 361e5112d2eca09513bbd266e4b2d2be-Supplemental-Conference.zip › supplementary/code/image_classification/conf/pretrained_model/unet.yaml]

# @package _global_
pretrained_model:
  _target_: masked_autoencoding.src.models.unet.UNet

  in_chns: 3
  out_chns: 3
  init_features: 24
  octaves: 2

experiment:
  pretrained_model_path:
    mnist: 'PATH/TO/nca_best.pth.tar'  # MNIST
    fashionmnist: 'PATH/TO/nca_best.pth.tar'  # FashionMNIST
    cifar10: 'PATH/TO/nca_best.pth.tar'  # CIFAR10
    tinyimagenet: 'PATH/TO/nca_best.pth.tar'  # TinyImageNet
