# Supplementary material
Source: ML conference proceedings conference paper supplement (https://proceedings.neurips.cc/paper_files/paper/2022/hash/361e5112d2eca09513bbd266e4b2d2be-Abstract.html)
Supplement: Supplementary file 1 [file 361e5112d2eca09513bbd266e4b2d2be-Supplemental-Conference.zip › supplementary/code/image_classification/conf/pretrained_model/unetca.yaml]

# @package _global_
pretrained_model:
  _target_: masked_autoencoding.src.models.unetca.UNetCA

  nca_mode: true  # true -> UNet's 3x3 convs are changed to 1x1 except the first

  pe_method: null  # Type of positional encoding/embedding for transformer. 'vit_handcrafted', 'nerf_handcrafted', or null for no positional encoding
  nerf_pe_basis: sin_cos_xy  # Choices: raw_xy, sin_cos, sin_cos_xy, sinc
  nerf_pe_max_freq: 5  # Max frequency of positional encoding. Measured as 2^L-1 where L = pe_max_freq.

  octaves: 2

  cell_init: 'constant'  # 'constant' or 'random'
  cell_in_chns: 3
  cell_out_chns: 3
  cell_hidden_chns: 32
  init_features: 48

experiment:
  pretrained_model_path:
    mnist: 'PATH/TO/nca_best.pth.tar'  # MNIST
    fashionmnist: 'PATH/TO/nca_best.pth.tar'  # FashionMNIST
    cifar10: 'PATH/TO/nca_best.pth.tar'  # CIFAR10
    tinyimagenet: 'PATH/TO/nca_best.pth.tar'  # TinyImageNet
