# Supplementary material
Source: ML conference proceedings conference paper supplement (https://proceedings.neurips.cc/paper_files/paper/2022/hash/361e5112d2eca09513bbd266e4b2d2be-Abstract.html)
Supplement: Supplementary file 1 [file 361e5112d2eca09513bbd266e4b2d2be-Supplemental-Conference.zip › supplementary/code/image_classification/src/classifiers/linear.py]

import torch


class Linear(torch.nn.Module):
	def __init__(self, in_chns, num_classes):
		super().__init__()
		self.in_chns = in_chns
		self.num_classes = num_classes
		self.classify = torch.nn.Linear(self.in_chns, self.num_classes)

	def forward(self, x):
		return self.classify(x)
