# Supplementary material
Source: ML conference proceedings conference paper supplement (https://proceedings.neurips.cc/paper_files/paper/2022/hash/361e5112d2eca09513bbd266e4b2d2be-Abstract.html)
Supplement: Supplementary file 1 [file 361e5112d2eca09513bbd266e4b2d2be-Supplemental-Conference.zip › supplementary/code/image_classification/src/classifiers/nonlinear.py]

import torch


class NonLinear(torch.nn.Module):
	def __init__(self, in_chns, hidden_chns, num_classes):
		super().__init__()
		self.in_chns = in_chns
		self.hidden_chns = hidden_chns
		self.num_classes = num_classes

		self.classify = torch.nn.Sequential(
			torch.nn.Linear(in_chns, hidden_chns),
			torch.nn.ReLU(),
			torch.nn.Linear(hidden_chns, num_classes)
		)

	def forward(self, x):
		return self.classify(x)
