# Supplementary material
Source: ML conference proceedings conference paper supplement (https://proceedings.neurips.cc/paper_files/paper/2022/hash/361e5112d2eca09513bbd266e4b2d2be-Abstract.html)
Supplement: Supplementary file 1 [file 361e5112d2eca09513bbd266e4b2d2be-Supplemental-Conference.zip › supplementary/code/image_classification/src/losses.py]

import torch

from torchmetrics.functional import peak_signal_noise_ratio as psnr
from torchmetrics.functional import structural_similarity_index_measure as ssim
from torchmetrics.functional import accuracy as accuracy
from torchmetrics.image.lpip import LearnedPerceptualImagePatchSimilarity

import __init__
from image_classification.src.utils import mono_to_rgb


class CALoss(torch.nn.Module):
	def __init__(self, rec_factor=1e2, overflow_factor=1e2):
		super().__init__()
		self.rec_factor = rec_factor
		self.overflow_factor = overflow_factor
		self.lpips = None

	def inst_lpips(self, device):
		self.lpips = LearnedPerceptualImagePatchSimilarity('vgg').to(device)
		self.lpips.requires_grad_(False)
		self.lpips.eval()

	def forward(self, cfg, model, results, phase='train'):
		cells = results['output_cells']
		hidden = model.get_hidden(cells)
		output_logits = results['output_logits']
		target_class = results['ground_truth']['y'].squeeze().long()
		output_img = results['output_img']
		target_img = results['ground_truth']['x']

		losses = {}

		# Cross entropy loss
		losses['ce_loss'] = torch.nn.functional.cross_entropy(output_logits, target_class, ignore_index=-1)

		# L1 loss for image reconstruction task
		losses['rec_loss'] = self.rec_factor*torch.nn.functional.l1_loss(output_img, target_img)

		# Overflow loss to prevent cell state overflow
		hidden_overflow_loss = (hidden - torch.clip(hidden, -1.0, 1.0)).abs().mean()
		rgb_overflow_loss = (output_img - torch.clip(output_img, 0, 1)).abs().mean()
		losses['overflow_loss'] = self.overflow_factor * (hidden_overflow_loss + rgb_overflow_loss)

		if phase == 'test' or phase == 'validation':
			output_img = torch.clip(output_img, 0, 1)
			target_img = torch.clip(target_img, 0, 1)
			losses['psnr'] = psnr(output_img, target_img, data_range=1.0)

			losses['acc_top1'] = accuracy(output_logits, target_class, ignore_index=-1, top_k=1)
			losses['acc_top3'] = accuracy(output_logits, target_class, ignore_index=-1, top_k=3)
			losses['acc_top5'] = accuracy(output_logits, target_class, ignore_index=-1, top_k=5)

			if phase == 'test':
				losses['ssim'] = ssim(output_img, target_img, data_range=1.0)

				if self.lpips:
					# Expects input to be in range [-1,1] with shape (N, 3, H, W)
					losses['lpips'] = self.lpips(mono_to_rgb(output_img*2-1), mono_to_rgb(target_img*2-1))

		return losses


class Loss(torch.nn.Module):
	def __init__(self, rec_factor=1e2, overflow_factor=1e2):
		super().__init__()
		self.rec_factor = rec_factor
		self.overflow_factor = overflow_factor
		self.lpips = None

	def inst_lpips(self, device):
		self.lpips = LearnedPerceptualImagePatchSimilarity('vgg').to(device)
		self.lpips.requires_grad_(False)
		self.lpips.eval()

	def forward(self, cfg, model, results, phase='train'):
		output_logits = results['output_logits']
		target_class = results['ground_truth']['y'].squeeze().long()
		output_img = results['output_img']
		target_img = results['ground_truth']['x']

		losses = {}

		# Cross entropy loss
		losses['ce_loss'] = torch.nn.functional.cross_entropy(output_logits, target_class, ignore_index=-1)

		# L1 loss for image reconstruction task
		losses['rec_loss'] = self.rec_factor*torch.nn.functional.l1_loss(output_img, target_img)

		# Overflow loss to prevent cell state overflow
		rgb_overflow_loss = (output_img - torch.clip(output_img, 0, 1)).abs().mean()
		losses['overflow_loss'] = self.overflow_factor * rgb_overflow_loss

		if phase == 'test' or phase == 'validation':
			output_img = torch.clip(output_img, 0, 1)
			target_img = torch.clip(target_img, 0, 1)
			losses['psnr'] = psnr(output_img, target_img, data_range=1.0)

			losses['acc_top1'] = accuracy(output_logits, target_class, ignore_index=-1, top_k=1)
			losses['acc_top3'] = accuracy(output_logits, target_class, ignore_index=-1, top_k=3)
			losses['acc_top5'] = accuracy(output_logits, target_class, ignore_index=-1, top_k=5)

			if phase == 'test':
				losses['ssim'] = ssim(output_img, target_img, data_range=1.0)

				if self.lpips:
					# Expects input to be in range [-1,1] with shape (N, 3, H, W)
					losses['lpips'] = self.lpips(mono_to_rgb(output_img*2-1), mono_to_rgb(target_img*2-1))

		return losses
