# Supplementary material
Source: ML conference proceedings conference paper supplement (https://proceedings.neurips.cc/paper_files/paper/2022/hash/361e5112d2eca09513bbd266e4b2d2be-Abstract.html)
Supplement: Supplementary file 1 [file 361e5112d2eca09513bbd266e4b2d2be-Supplemental-Conference.zip › supplementary/code/masked_autoencoding/conf/inference_config.yaml]

defaults:
  - _self_
  - dataset: mnist
  - model: vitca
  - override hydra/job_logging: colorlog
  - override hydra/hydra_logging: colorlog

use_pretrained_cfg: true
use_pretrained_size: true
viz_for_paper:
  enabled: true
  ca_iters_to_save: [1, 2, 8, 32, 2784]  # for convergence stability
  # ca_iters_to_save: [64, 65, 96, 97, 738]  # for damage resilience
  # ca_iters_to_save: [224, 464, 704, 944, 1184]  # for changing input
  # ca_iters_to_save: [1, 12, 18, 24, 48]  # for varying update rate unetca
  # ca_iters_to_save: [1, 8, 12, 16, 32]  # for varying update rate vitca
  # ca_iters_to_save: [1, 2, 8, 32, 149]  # for spatial interpolation
viz_attn_maps:
  brighten_factor: 5.0  # might accidentally clip attn values, but it makes it easier to see
  blend_with_output: false
damage:
  enabled: false
  random:
    enabled: false
    rate: 0.05
    start_at: 43  # start frame and stop frame are inclusive and exclusive, respectively
    stop_at: 101
  at_frames: [65, 97]
switch_up:
  enabled: false
  frame_time: 30
head_masking:
  enabled: false
  heads_to_mask: [0, 1, 2, 3]  # 0-indexed
completely_mask_input: false
custom_growth_rate: true
fps: 30.0
# fps: 8  # for varying update rate
# frames: 300
frames: 150  # for damage resilience
# frames: 48  # for varying update rate
speed_up:
  enabled: true
  start_at: 65  # start frame is inclusive, for convergence stability
  # start_at: 131  # for damage resilience
  factor: 32
font_path: null

experiment:
  name: ${dataset.name}
  device: cuda:0
  save_root: SAVE_ROOT
  num_workers: 2
  deterministic: true
  pretrained_model_path: 'FOLDER/TO/nca_best.pth.tar'  # ViTCA (LandCoverRep)

  iter:
    inf:
      total: 1  # how many iterations through dataset
      ca:
        value: 1  # only used when custom_growth_rate = true
        # value: 8  # only used when custom_growth_rate = true, for changing input
        update_rate: 0.5

  trainer:
    loss:
      _target_: masked_autoencoding.src.losses.CALoss
      # _target_: masked_autoencoding.src.losses.Loss  # for non-CA models
      rec_factor: 1e2
      overflow_factor: 1e2
    checkpointing:
      enabled: false

  batch_size:
    inf: 32

  input_size:
    inf: [32, 32]
    # inf: [128, 128]  # for spatial interpolation

  attn_size:
    inf: [3, 3]

  random_seed: 1

  masking:
    inf:
      type: dropout
      prob: 0.75
      patch_shape: [4, 4]

hydra:
  run:
    dir: ${experiment.save_root}/${experiment.name}/${now:%Y-%m-%d}/${now:%H-%M-%S}
