# Supplementary material
Source: ML conference proceedings conference paper supplement (https://proceedings.neurips.cc/paper_files/paper/2022/hash/361e5112d2eca09513bbd266e4b2d2be-Abstract.html)
Supplement: Supplementary file 1 [file 361e5112d2eca09513bbd266e4b2d2be-Supplemental-Conference.zip › supplementary/code/masked_autoencoding/conf/model/tnca.yaml]

_target_: masked_autoencoding.src.models.tnca.TNCA

perception_method: handcrafted  # or 'learned'
pe_method: vit_handcrafted  # Type of positional encoding/embedding for transformer. 'vit_handcrafted', 'nerf_handcrafted', or null for no positional encoding
nerf_pe_basis: sin_cos  # Choices: raw_xy, sin_cos, sin_cos_xy, sinc
nerf_pe_max_freq: 5  # Max frequency of positional encoding. Measured as 2^L-1 where L = pe_max_freq.

cell_init: 'constant'  # 'constant' or 'random'
cell_in_chns: 3
cell_out_chns: 3
cell_hidden_chns: 32
embed_dim: 128
