# Supplementary material
Source: ML conference proceedings conference paper supplement (https://proceedings.neurips.cc/paper_files/paper/2022/hash/361e5112d2eca09513bbd266e4b2d2be-Abstract.html)
Supplement: Supplementary file 1 [file 361e5112d2eca09513bbd266e4b2d2be-Supplemental-Conference.zip › supplementary/code/masked_autoencoding/conf/model/vitca_sincos5xy.yaml]

# @package _global_
model:
  _target_: masked_autoencoding.src.models.vitca.ViTCA

  localize_attn: true  # Localize transformer attn in a neighbourhood surrounding each cell
  localized_attn_neighbourhood: [3, 3]

  patch_size: 1  # Spatial patch size each cell overlaps
  overlapping_patches: false
  pe_method: nerf_handcrafted  # Type of positional encoding/embedding for transformer. 'vit_handcrafted', 'nerf_handcrafted', 'learned', or null for no positional encoding
  nerf_pe_basis: sin_cos_xy  # Choices: raw_xy, sin_cos, sin_cos_xy, sinc
  nerf_pe_max_freq: 5  # Max frequency of positional encoding. Measured as 2^L-1 where L = pe_max_freq. L = 5 -> 32x32.

  octaves: 0

  depth: 1
  heads: 4
  mlp_dim: 64
  dropout: 0.0
  cell_init: 'constant'  # 'constant' or 'random'
  cell_in_chns: 3
  cell_out_chns: 3
  cell_hidden_chns: 32
  embed_cells: true
  embed_dim: 128
  embed_dropout: 0.0


experiment:
  pretrained_model_path:
    landcoverrep: 'FOLDER/TO/nca_best.pth.tar'
    mnist: 'FOLDER/TO/nca_best.pth.tar'
    celeba: 'FOLDER/TO/nca_best.pth.tar'
    fashionmnist: 'FOLDER/TO/nca_best.pth.tar'
    cifar10: 'FOLDER/TO/nca_best.pth.tar'
    tinyimagenet: 'FOLDER/TO/nca_best.pth.tar'
