# Supplementary material
Source: ML conference proceedings conference paper supplement (https://proceedings.neurips.cc/paper_files/paper/2022/hash/361e5112d2eca09513bbd266e4b2d2be-Abstract.html)
Supplement: Supplementary file 1 [file 361e5112d2eca09513bbd266e4b2d2be-Supplemental-Conference.zip › supplementary/code/masked_autoencoding/conf/test_config.yaml]

defaults:
  - _self_
  - dataset: landcoverrep
  - model: vitca
  - override hydra/job_logging: colorlog
  - override hydra/hydra_logging: colorlog

use_pretrained_cfg: true
use_pretrained_size: true
save_pca_data: false
pca_components: 3
no_noise: false

experiment:
  name: ${dataset.name}
  device: cuda:0
  save_root: SAVE_ROOT
  num_workers: 2
  deterministic: true
  pretrained_model_path: 'FOLDER/TO/nca_best.pth.tar'  # ViTCA (LandCoverRep)

  log_frequency: 11
  save_frequency: 10

  trainer:
    loss:
      _target_: masked_autoencoding.src.losses.CALoss
      # _target_: masked_autoencoding.src.losses.Loss  # for non-CA models
      rec_factor: 1e2
      overflow_factor: 1e2
    checkpointing:
      enabled: false

  iter:
    test:
      ca:
        value: 64
        update_rate: 0.5

  batch_size:
    test: 32

  input_size:
    test: [32, 32]

  attn_size:
    test: [3, 3]

  random_seed: 1

  masking:
    test:
      type: dropout
      max_prob: 0.75
      max_patch_shape: [4, 4]
      prob_stages: 3
      patch_shape_stages: 3

hydra:
  run:
    dir: ${experiment.save_root}/${experiment.name}/${now:%Y-%m-%d}/${now:%H-%M-%S}
  sweep:
    dir: ${experiment.save_root}/${experiment.name}/${now:%Y-%m-%d}/${now:%H-%M-%S}
    subdir: ${hydra.job.num}_${hydra.job.id}
