# Supplementary material
Source: ML conference proceedings conference paper supplement (https://proceedings.neurips.cc/paper_files/paper/2022/hash/361e5112d2eca09513bbd266e4b2d2be-Abstract.html)
Supplement: Supplementary file 1 [file 361e5112d2eca09513bbd266e4b2d2be-Supplemental-Conference.zip › supplementary/code/masked_autoencoding/conf/train_config.yaml]

defaults:
  - _self_
  - dataset: landcoverrep
  - model: vitca
  - override hydra/job_logging: colorlog
  - override hydra/hydra_logging: colorlog

experiment:
  name: landcoverrep_default
  device: cuda:0
  save_root: SAVE_ROOT
  num_workers: 2

  trainer:
    opt:
      _target_: torch.optim.AdamW
      lr: 1e-3
    lr_sched:
      _target_: torch.optim.lr_scheduler.CosineAnnealingLR
      T_max: ${experiment.iter.train.total}
    loss:
      _target_: masked_autoencoding.src.losses.CALoss
      # _target_: masked_autoencoding.src.losses.Loss  # for non-CA models
      rec_factor: 1e2
      overflow_factor: 1e2
    checkpointing:
      enabled: false

  iter:
    train:
      start: 1
      total: 100000
      ca:
        min: 8
        max: 32
        update_rate: 0.5
    val:
      ca:
        value: 64
        update_rate: 0.5

  batch_size:
    train: 32
    val: 32

  pool_size: 1024
  resume_from_latest: true

  sample_with_replacement: false

  input_size:
    train: [32, 32]
    val: [32, 32]

  attn_size:
    train: [3, 3]
    val: [3, 3]

  log_frequency: 11
  save_frequency: 5000
  val_frequency: 1000

  normalize_gradients: true

  random_seed: 1

  masking:
    train:
      type: dropout
      max_prob: 0.75
      max_patch_shape: [10, 10]
      prob_stages: 3
      patch_shape_stages: 3
      schedule_start: 500
      schedule_end: 10000
    val:
      type: dropout
      max_prob: 0.75
      max_patch_shape: [10, 10]
      prob_stages: 3
      patch_shape_stages: 3

wandb:
  entity: ENTITY
  project: PROJECT
  run_id: null

hydra:
  run:
    dir: ${experiment.save_root}/${experiment.name}/${now:%Y-%m-%d}/${now:%H-%M-%S}
