# Supplementary material
Source: ML conference proceedings conference paper supplement (https://proceedings.neurips.cc/paper_files/paper/2022/hash/361e5112d2eca09513bbd266e4b2d2be-Abstract.html)
Supplement: Supplementary file 1 [file 361e5112d2eca09513bbd266e4b2d2be-Supplemental-Conference.zip › supplementary/code/masked_autoencoding/inference.py]

"""
Main program
"""
import os
from pathlib import Path
import random
import math
import logging

import numpy as np
from sklearn.decomposition import PCA
from einops import rearrange

from torchvision.utils import make_grid
import torch.fft as fft

from tqdm import trange

import submitit

import cloudpickle
import src
# otherwise pickle.load from submitit launcher won't find src since cloudpickle registers by reference by default
cloudpickle.register_pickle_by_value(src)

from masked_autoencoding.src.utils import to_nhwc, draw_msg, VideoWriter, viz_attn_maps, imwrite
from masked_autoencoding.src.datasets import get_inf_dataset, random_mask
from masked_autoencoding.src.model_and_trainer import ModelAndTrainer

from omegaconf import DictConfig, OmegaConf, open_dict
import hydra

LOGGER = logging.getLogger(__name__)


@hydra.main(config_path='conf', config_name='inference_config')
def inference(cfg: DictConfig) -> None:
	try:
		env = submitit.JobEnvironment()
		LOGGER.info('Process ID %s executing inference experiment %s, with %s.', os.getpid(), cfg.experiment.name, env)
	except RuntimeError:
		LOGGER.info('Process ID %s executing inference experiment %s', os.getpid(), cfg.experiment.name)

	save = Path(os.getcwd())

	# For saving videos and images generated during inference
	vid_save_folder = save / 'vids'
	vid_save_folder.mkdir(exist_ok=True)
	imgs_save_folder = save / 'imgs'
	imgs_save_folder.mkdir(exist_ok=True)

	# Retrieving the path to the pretrained model checkpoint
	pretrained_model_path = cfg.experiment.pretrained_model_path.get(str(cfg.dataset.name).lower(), None)

	LOGGER.info('Current working/save directory: %s', save)

	# Merging base config with pretrained config, overwriting cfg params with
	# pretrained_cfg params when there are matches (overwrite priority goes right-to-left)
	if cfg.use_pretrained_cfg:
		LOGGER.info('Merging config used to train pretrained model...')

		# Loading pretrained config
		pretrained_cfg = Path(pretrained_model_path).parent / '.hydra/config.yaml'
		pretrained_cfg = OmegaConf.load(str(pretrained_cfg))

		# Pretrained configs to use
		masking_val_type_cfg = OmegaConf.select(pretrained_cfg, 'experiment.masking.val.type')
		loss_cfg = OmegaConf.select(pretrained_cfg, 'experiment.trainer.loss')
		model_cfg = OmegaConf.select(pretrained_cfg, 'model')
		dataset_cfg = OmegaConf.select(pretrained_cfg, 'dataset')
		input_size_cfg = OmegaConf.select(pretrained_cfg, 'experiment.input_size.train')

		# Remove deprecated keys
		loss_cfg.pop('jac_factor', None)
		model_cfg.pop('head_dim', None)

		# Remove old targets
		loss_cfg.pop('_target_', None)
		model_cfg.pop('_target_', None)

		# Merge/replace with pretrained config
		with open_dict(cfg):
			OmegaConf.update(cfg, 'experiment.masking.inf.type', masking_val_type_cfg, merge=False)
			if cfg.use_pretrained_size:
				OmegaConf.update(cfg, 'experiment.input_size.inf', input_size_cfg, merge=False)
		OmegaConf.update(cfg, 'experiment.trainer.loss', loss_cfg)
		OmegaConf.update(cfg, 'model', model_cfg)
		OmegaConf.update(cfg, 'dataset', dataset_cfg, merge=False)

		# Overwrite old config with merged one
		cfg_path = save / '.hydra' / 'config.yaml'
		LOGGER.info(f'Overwriting old config with merged config at {cfg_path}...')
		OmegaConf.save(cfg, cfg_path, resolve=True)

	# Lazy importing for pickling purposes with submitit and cloudpickle so that cuda.deterministic=True and 
	# cudnn.benchmark=False don't break the pickling process (they change the torch backend, so importing
	# them outside would mean pickle wouldn't pickle the modified torch)
	import torch
	from torch.utils.data import DataLoader
	import torch.backends.cudnn as cudnn

	# Setting deterministic behaviour for RNG for results reproducibility purposes
	torch.manual_seed(cfg.experiment.random_seed)
	torch.cuda.manual_seed(cfg.experiment.random_seed)
	if cfg.experiment.deterministic:
		cudnn.deterministic = True
		cudnn.benchmark = False
	else:
		cudnn.deterministic = False
		cudnn.benchmark = True
		LOGGER.warn('Using non-deterministic cudnn backend')
	np.random.seed(cfg.experiment.random_seed)
	random.seed(cfg.experiment.random_seed)

	# Displaying device info
	if torch.cuda.is_available and 'cuda' in cfg.experiment.device:
		device = torch.device(cfg.experiment.device)
		devices = list(range(torch.cuda.device_count()))
		devices_properties = [torch.cuda.get_device_properties(torch.device(f'cuda:{d}')) for d in devices]
		LOGGER.info('CUDA available.')
		for i in range(len(devices)):
			LOGGER.info('Using GPU/device %s: %s', i, devices_properties[i])
		mode = 'gpu'
	else:
		device = torch.device('cpu')
		LOGGER.info('CUDA not available. Using CPU mode.')
		mode = 'cpu'

	# Setup model
	LOGGER.info('Setting up model...')
	model_and_trainer = ModelAndTrainer(cfg, device, phase='inference')
	model = model_and_trainer.model

	# Load user-defined checkpoint for pre-trained model
	if not model_and_trainer.load_pretrained_model(cfg, ckpt_pth=pretrained_model_path):
		raise RuntimeError('Pretrained model checkpoint must be provided.')

	# Log model and number of params
	LOGGER.info('Using model: %s', model)
	num_train_params = sum(param.numel() for param in model.parameters() if param.requires_grad)
	num_nontrain_params = sum(param.numel() for param in model.parameters() if not param.requires_grad)
	LOGGER.info('Trainable params: %s', num_train_params)
	LOGGER.info('Untrainable params: %s', num_nontrain_params)
	LOGGER.info('Total number of params: %s', num_train_params + num_nontrain_params)

	# Setup dataset and dataloader
	input_size = list(cfg.experiment.input_size.inf)
	batch_size = cfg.experiment.batch_size.inf
	attn_size = getattr(model, 'localized_attn_neighbourhood', list(cfg.experiment.attn_size.inf))
	LOGGER.info(
		'Testing on dataset: %s, batch size: %s, image size: %s, attn size: %s',
		cfg.dataset.name, batch_size, input_size, attn_size
	)
	dataset = get_inf_dataset(cfg.dataset.name, cfg.dataset.dataset_root, input_size)
	gpuargs = {'num_workers': cfg.experiment.num_workers,
			   'pin_memory': True} if mode == 'gpu' else {}
	loader = DataLoader(dataset, batch_size=batch_size, shuffle=False, drop_last=False, **gpuargs)

	# PCA for visualizing cell hidden channels in RGB
	pca = PCA(n_components=3, random_state=int(cfg.experiment.random_seed), svd_solver='arpack')

	# Inference loop
	LOGGER.info('Inferencing for %s iterations.', cfg.experiment.iter.inf.total)
	model.eval()
	if 'CA' not in cfg.model._target_:
		for i, (x, _) in enumerate(loader, start=1):
			# Retrieve data
			x = x.to(device)

			# Create masked input
			masked_x = random_mask(x, p=cfg.experiment.masking.inf.prob,
								   mask_type=cfg.experiment.masking.inf.type,
								   patch_shape=cfg.experiment.masking.inf.patch_shape,
								   random_seed=cfg.experiment.random_seed, device=device)
			
			if cfg.completely_mask_input:
				masked_x *= 0.0

			# Feed forward
			output_img = model(masked_x)

			# Retrieving masked input imgs, output imgs, and ground truths. Also converting to RGB if Grayscale.
			if masked_x.shape[1] == 1:
				masked_x = masked_x.tile(1, 3, 1, 1)  # b 3 h w
			if output_img.shape[1] == 1:
				output_img = output_img.tile(1, 3, 1, 1)  # b 3 h w
			ground_truth = x  # b (1 or 3) h w
			if ground_truth.shape[1] == 1:
				ground_truth = ground_truth.tile(1, 3, 1, 1)  # b 3 h w

			# Making image grid of above images
			img = torch.cat([
				make_grid(masked_x, nrow=batch_size, pad_value=1),
				make_grid(output_img, nrow=batch_size, pad_value=1),
				make_grid(ground_truth, nrow=batch_size, pad_value=1)
			], 1)

			# Save image to disk
			img_fname = str(imgs_save_folder / f'output_{i:03}.png')
			imwrite(img_fname, img)

			if i == cfg.experiment.iter.inf.total:
				break

	elif not cfg.switch_up.enabled:
		pe_dim = getattr(model, 'cell_pe_patch_dim', getattr(model, 'cell_pe_dim', None))
		in_dim = getattr(model, 'cell_in_patch_dim', getattr(model, 'cell_in_dim', None))
		out_dim = getattr(model, 'cell_out_patch_dim', getattr(model, 'cell_out_dim', None))
		for i, (x, _) in enumerate(loader, start=1):
			# Retrieve data
			x = x.to(device)

			# For saving images to disk
			all_output_imgs = []
			all_attn_maps = []
			all_other_imgs = []

			saved_so_far = 0

			vid_fname = str(vid_save_folder / f'output_{i:03}.mp4')
			with VideoWriter(filename=vid_fname, fps=cfg.fps) as vid, torch.no_grad():

				# Create masked input. Re-use same random seed for each frame so noise pattern doesn't change between
				# frames
				masked_x = random_mask(x, p=cfg.experiment.masking.inf.prob,
									   mask_type=cfg.experiment.masking.inf.type,
									   patch_shape=cfg.experiment.masking.inf.patch_shape,
									   random_seed=cfg.experiment.random_seed, device=device)

				if cfg.completely_mask_input:
					masked_x *= 0.0

				# Create seed cell grid with injected masked input
				cells = model.seed(rgb_in=masked_x, sz=input_size)

				iters_so_far = 0

				for k in trange(cfg.frames, desc='Inference...'):

					# Damage a (H/2)x(W/2) patch of the cell grid (cell output and hidden channels)
					if cfg.damage.enabled:

						# Only do damage if below conditions are met. Can do damage at random frames or user-specified
						# frames
						if cfg.damage.random.enabled:
							do_damage = (
								math.floor(random.random()+cfg.damage.random.rate) == 1 and
								k >= cfg.damage.random.start_at and k < cfg.damage.random.stop_at
							)
						elif k in list(cfg.damage.at_frames):
							do_damage = True
						else:
							do_damage = False

						if do_damage:
							# Damage consists of values uniformly dist. between [-1,1]
							dmg = torch.rand(batch_size, model.cell_update_dim,
											 cells.shape[-2]//2, cells.shape[-1]//2,
											 dtype=cells.dtype, device=cells.device)*2-1

							# Setting center 2x2 patch of noise to white for ease of seeing where it is
							# dmg[:, :out_dim,
							# 	(dmg.shape[-2]-1)//2-2:(dmg.shape[-2]-1)//2+2,
							# 	(dmg.shape[-1]-1)//2-2:(dmg.shape[-1]-1)//2+2] = 1

							# Making sure the patch is fully within the cell grid
							start_i = random.randint(0, cells.shape[-2]//2-1)
							start_j = random.randint(0, cells.shape[-1]//2-1)
							end_i, end_j = start_i + dmg.shape[-2], start_j + dmg.shape[-1]

							# Set cell states in damage region to damage values
							cells[:, pe_dim+in_dim:, start_i:end_i, start_j:end_j] = dmg

					# Iterate nca (only after the first frame since we want to show seed)
					if k > 0:
						if cfg.damage.enabled or cfg.custom_growth_rate:
							if k == 1:  # Always force 1 CA iteration for the very first frame
								T = 1
							else:
								T = cfg.experiment.iter.inf.ca.value
								if T > 1 and k == 2:
									T -= 1
								elif k >= cfg.speed_up.start_at and cfg.speed_up.enabled:
									T = cfg.experiment.iter.inf.ca.value * cfg.speed_up.factor
						else:
							# Rudimentary iteration schedule that accelerates CA iterations from 1 to 16 steps per frame
							# during the first 121 frames (assuming 30 fps).
							# # [1 (0<k<30), ..., 2 (k=30), ..., 4 (k=60), ..., 8 (k=90), ..., 16 (k=120), ...]
							T = min(2**(k//cfg.fps), 16)

						# Iterate
						if not cfg.head_masking.enabled:
							cells = model(cells, step_n=T, update_rate=cfg.experiment.iter.inf.ca.update_rate, 
										  attn_size=attn_size)
						else:
							cells = model(cells, step_n=T, update_rate=cfg.experiment.iter.inf.ca.update_rate, 
										  attn_size=attn_size, mask=cfg.head_masking.heads_to_mask)
						iters_so_far += T

					# Retrieving masked input imgs and making RGB if Grayscale
					masked_x = model.get_rgb_in(cells).clone()  # b (1 or 3) h w
					if masked_x.shape[1] == 1:
						masked_x = masked_x.tile(1, 3, 1, 1)  # b 3 h w

					# Retrieving output imgs and making RGB if Grayscale
					output_img = model.get_rgb_out(cells).clone()  # b (1 or 3) h w
					if output_img.shape[1] == 1:
						output_img = output_img.tile(1, 3, 1, 1)  # b 3 h w

					# For visualizing the hidden channels using PCA (but retaining spatial dims).
					#
					# Since hidden chn values are between [-1,1], they are visualized in RGB (via PCA) through a 
					# "positive" and "negative" image. Positive PCA img contains positive hidden chn values [0,1] and 
					# negative PCA img contains negative hidden chn values flipped to [0,1].
					#
					# Despite manually setting PCA random seed and forcing arpack to be used, sometimes the axes flip
					# which casuses the pos/neg PCA images to sort of colour invert.
					hidden = model.get_hidden(cells).clone()  # b num_hidden h w
					b, num_hidden, h, w = hidden.shape
					hidden = rearrange(hidden, 'b hidden h w -> (b h w) hidden')
					try:
						hidden_pca = pca.fit_transform(hidden.cpu().numpy())  # (b h w) 3
					except Exception:
						LOGGER.error('Error with ARPACK. Will use zeros for pca instead.')
						hidden_pca = np.zeros((b*h*w, 3), dtype=np.float32)
					hidden_img = rearrange(hidden_pca, '(b h w) c -> b c h w', b=b, h=h, w=w)
					hidden_img_pos = torch.tensor(hidden_img.copy(), dtype=torch.float32, device=output_img.device)
					hidden_img_neg = hidden_img_pos * -1.0

					# Retrieving ground truth imgs and making RGB if Grayscale
					ground_truth = x  # b (1 or 3) h w
					if ground_truth.shape[1] == 1:
						ground_truth = ground_truth.tile(1, 3, 1, 1)  # b 3 h w

					# Retrieving FFT phase and magnitude
					fft_img = fft.fftshift(fft.fft2(output_img, norm='ortho'))
					fft_img_phase = torch.angle(fft_img)
					fft_img_phase = (fft_img_phase/torch.pi + 1)/2  # clamp to [0, 1]
					fft_img_mag = torch.abs(fft_img)

					# Converting for display
					fft_img_phase = fft_img_phase.mean(1, keepdim=True).repeat(1, output_img.shape[1], 1, 1)
					fft_img_mag = fft_img_mag.mean(1, keepdim=True).repeat(1, output_img.shape[1], 1, 1)

					# Creating visualized localized attention maps as colour-blended splats about each cell's position
					# Each cell's local attention map is colour-coded based on the cell's position (e.g., top-left
					# cell's 3x3 attention map is blue). Overlapping maps are colour-averaged.
					if 'ViT' in cfg.model._target_:
						if iters_so_far > 0:
							attn_maps = [
								viz_attn_maps(layer[0].fn.attn_maps, attn_size, output_img,
											blend=cfg.viz_attn_maps.blend_with_output,
											brighten=cfg.viz_attn_maps.brighten_factor)
								for layer in model.transformer.layers
							]
						else:
							attn_maps = [
								torch.zeros(b*cfg.model.heads, 3, h, w, device=device)
								for _ in model.transformer.layers
							]
						attn_maps_img = draw_msg(make_grid(attn_maps[0], nrow=batch_size, pad_value=1),
												'layer 1 heads', 'prepend')
						for j in range(1, len(attn_maps)):
							_attn_maps_img = draw_msg(
								make_grid(attn_maps[j], nrow=batch_size, pad_value=1), f'layer {j+1} heads', 'prepend'
							)
							attn_maps_img = torch.cat([attn_maps_img, _attn_maps_img], 1)

					# Making image grid of above images
					main_img = make_grid(torch.cat([masked_x, output_img, ground_truth], 0), nrow=batch_size,
									     pad_value=1)
					main_img = draw_msg(main_img, 'input, out, gt', 'prepend')
					fourier_img = make_grid(torch.cat([fft_img_mag, fft_img_phase], 0), nrow=batch_size, pad_value=1)
					fourier_img = draw_msg(fourier_img, 'fourier analysis', 'prepend')
					hidden_img_pos = make_grid(hidden_img_pos, nrow=batch_size, pad_value=1)
					hidden_img_pos = draw_msg(hidden_img_pos, f'hidden pos (pca {num_hidden}->3)', 'prepend')
					hidden_img_neg = make_grid(hidden_img_neg, nrow=batch_size, pad_value=1)
					hidden_img_neg = draw_msg(hidden_img_neg, f'hidden neg (pca {num_hidden}->3)', 'prepend')
					if 'ViT' in cfg.model._target_:
						final_img = torch.cat([main_img, fourier_img, attn_maps_img, hidden_img_pos, hidden_img_neg], 1)
					else:
						final_img = torch.cat([main_img, fourier_img, hidden_img_pos, hidden_img_neg], 1)
					final_img = draw_msg(final_img, f'iteration {iters_so_far}', 'append')
					final_img = to_nhwc(final_img).squeeze(0).cpu()

					# Add grid image for current frame to VideoWriter. It will automatically convert to uint8 (0, 255)
					vid.add(final_img)

					# Storing inputs and outputs to be used for visualization later
					if cfg.viz_for_paper.enabled:
						if (k == 0 or
							iters_so_far in list(cfg.viz_for_paper.ca_iters_to_save) or
							'all' in list(cfg.viz_for_paper.ca_iters_to_save)):
							all_output_imgs.append(output_img)
							if 'ViT' in cfg.model._target_:
								attn_maps = torch.cat(attn_maps, 0)  # (l heads b) c h w
								attn_maps = rearrange(
									attn_maps,
									'(l heads b) c h w -> b c (l heads h) w',
									b=batch_size,
									l=len(model.transformer.layers)
								)
								all_attn_maps.append(attn_maps)
							if k == 0:
								all_other_imgs.append(masked_x)
							elif iters_so_far == list(cfg.viz_for_paper.ca_iters_to_save)[-1]:
								all_other_imgs.append(ground_truth)
							elif k < cfg.frames-1:
								all_other_imgs.append(torch.ones_like(masked_x))
							elif k == cfg.frames-1:
								all_other_imgs.append(ground_truth)
							# Save to disk. It will automatically convert to uint8 (0, 255).
							img_fname = str(vid_save_folder / f'output_{i:03}_{k:03}.png')
							imwrite(img_fname, final_img)
							saved_so_far += 1

			# Creating and saving images designed for visualizing for paper
			if cfg.viz_for_paper.enabled:
				for j in trange(batch_size, desc='Saving images in minibatch...'):
					_all_other_imgs = torch.stack([all_other_imgs[k][j] for k in range(saved_so_far)], 0)
					other_img = make_grid(_all_other_imgs, nrow=saved_so_far, pad_value=1)
					_all_output_imgs = torch.stack([all_output_imgs[k][j] for k in range(saved_so_far)], 0)
					output_img = make_grid(_all_output_imgs, nrow=saved_so_far, pad_value=1)
					if 'ViT' in cfg.model._target_:
						_all_attn_maps = torch.stack([all_attn_maps[k][j] for k in range(saved_so_far)], 0)
						attn_img = make_grid(_all_attn_maps, nrow=saved_so_far, pad_value=1)
						img = torch.cat([other_img, output_img, attn_img], 1)
					else:
						img = torch.cat([other_img, output_img], 1)

					# Save to disk. It will automatically convert to uint8 (0, 255).
					img_fname = str(imgs_save_folder / f'output_{i:03}_{j:03}.png')
					imwrite(img_fname, img)
				LOGGER.info('Inference iter %s/%s: saved images at: %s', i, cfg.experiment.iter.inf.total,
							imgs_save_folder)

			LOGGER.info('Inference iter %s/%s: output path: %s', i, cfg.experiment.iter.inf.total, vid_fname)
			if i == cfg.experiment.iter.inf.total:
				break

	# TODO: clean up below to avoid code duplication and promote code re-use
	else:  # Keeping the same cell-grid and re-seeding it as we iterate through dataset (aka "switch-up")
		pe_dim = getattr(model, 'cell_pe_patch_dim', getattr(model, 'cell_pe_dim', None))
		in_dim = getattr(model, 'cell_in_patch_dim', getattr(model, 'cell_in_dim', None))
		out_dim = getattr(model, 'cell_out_patch_dim', getattr(model, 'cell_out_dim', None))
		vid_fname = str(vid_save_folder / f'output.mp4')
		with VideoWriter(filename=vid_fname, fps=cfg.fps) as vid, torch.no_grad():

			# Retrieve data
			loader = iter(loader)
			x, _ = next(loader)
			x = x.to(device)

			# For saving images to disk
			all_gt_imgs = []
			all_output_imgs = []
			all_attn_maps = []
			all_input_imgs = []

			# Create masked input. Re-use same random seed for each frame so noise pattern doesn't change between frames
			masked_x = random_mask(x, p=cfg.experiment.masking.inf.prob,
								   mask_type=cfg.experiment.masking.inf.type,
								   patch_shape=cfg.experiment.masking.inf.patch_shape,
								   random_seed=cfg.experiment.random_seed, device=device)

			if cfg.completely_mask_input:
				masked_x *= 0.0

			# Create seed cell grid with injected masked input
			cells = model.seed(rgb_in=masked_x, sz=input_size)

			iters_so_far = 0
			saved_so_far = 0

			for k in trange(cfg.frames, desc='Inference...'):

				# Damage a (H/2)x(W/2) patch of the cell grid (cell output and hidden channels)
				if cfg.damage.enabled:

					# Only do damage if below conditions are met. Can do damage at random frames or user-specified
					# frames
					if cfg.damage.random.enabled:
						do_damage = (
							math.floor(random.random()+cfg.damage.random.rate) == 1 and
							k >= cfg.damage.random.start_at and k < cfg.damage.random.stop_at
						)
					elif k in list(cfg.damage.at_frames):
						do_damage = True
					else:
						do_damage = False

					if do_damage:
						# Damage consists of values uniformly dist. between [-1,1]
						dmg = torch.rand(batch_size, model.cell_update_dim,
										 cells.shape[-2]//2, cells.shape[-1]//2,
										 dtype=cells.dtype, device=cells.device)*2-1

						# Setting center 2x2 patch of noise to white for ease of seeing where it is
						# dmg[:, :out_dim,
						# 	(dmg.shape[-2]-1)//2-2:(dmg.shape[-2]-1)//2+2,
						# 	(dmg.shape[-1]-1)//2-2:(dmg.shape[-1]-1)//2+2] = 1

						# Making sure the patch is fully within the cell grid
						start_i = random.randint(0, cells.shape[-2]//2-1)
						start_j = random.randint(0, cells.shape[-1]//2-1)
						end_i, end_j = start_i + dmg.shape[-2], start_j + dmg.shape[-1]

						# Set cell states in damage region to damage values 
						cells[:, pe_dim+in_dim:, start_i:end_i, start_j:end_j] = dmg

				# Iterate nca (only after the first frame since we want to show seed)
				if k > 0:
					if cfg.damage.enabled or cfg.custom_growth_rate:
						if k == 1:  # Always force 1 CA iteration for the very first frame
							T = 1
						else:
							T = cfg.experiment.iter.inf.ca.value
							if T > 1 and k == 2:
								T -= 1
							elif k >= cfg.speed_up.start_at and cfg.speed_up.enabled:
								T = 32
					else:
						# Rudimentary iteration schedule that accelerates CA iterations from 1 to 16 steps per frame
						# during the first 121 frames (assuming 30 fps).
						# # [1 (0<k<30), ..., 2 (k=30), ..., 4 (k=60), ..., 8 (k=90), ..., 16 (k=120), ...]
						T = min(2**(k//cfg.fps), 16)

					# Iterate
					if not cfg.head_masking.enabled:
						cells = model(cells, step_n=T, update_rate=cfg.experiment.iter.inf.ca.update_rate, 
									  attn_size=attn_size)
					else:
						cells = model(cells, step_n=T, update_rate=cfg.experiment.iter.inf.ca.update_rate, 
									  attn_size=attn_size, mask=cfg.head_masking.heads_to_mask)
					iters_so_far += T

				# Retrieving masked input imgs and making RGB if Grayscale
				masked_x = model.get_rgb_in(cells).clone()  # b (1 or 3) h w
				if masked_x.shape[1] == 1:
					masked_x = masked_x.tile(1, 3, 1, 1)  # b 3 h w

				# Retrieving output imgs and making RGB if Grayscale
				output_img = model.get_rgb_out(cells).clone()  # b (1 or 3) h w
				if output_img.shape[1] == 1:
					output_img = output_img.tile(1, 3, 1, 1)  # b 3 h w

				# For visualizing the hidden channels using PCA (but retaining spatial dims).
				#
				# Since hidden chn values are between [-1,1], they are visualized in RGB (via PCA) through a "positive"
				# and "negative" image. Positive PCA img contains positive hidden chn values [0,1] and negative PCA img
				# contains negative hidden chn values flipped to [0,1].
				#
				# Despite manually setting PCA random seed and forcing arpack to be used, sometimes the axes flip
				# which casuses the pos/neg PCA images to sort of colour invert.
				hidden = model.get_hidden(cells).clone()  # b num_hidden h w
				b, num_hidden, h, w = hidden.shape
				hidden = rearrange(hidden, 'b hidden h w -> (b h w) hidden')
				try:
					hidden_pca = pca.fit_transform(hidden.cpu().numpy())  # (b h w) 3
				except Exception:
					LOGGER.error('Error with ARPACK. Will use zeros for pca instead.')
					hidden_pca = np.zeros((b*h*w, 3), dtype=np.float32)
				hidden_img = rearrange(hidden_pca, '(b h w) c -> b c h w', b=b, h=h, w=w)
				hidden_img_pos = torch.tensor(hidden_img.copy(), dtype=torch.float32, device=output_img.device)
				hidden_img_neg = hidden_img_pos * -1.0

				# Retrieving ground truth imgs and making RGB if Grayscale
				ground_truth = x  # b (1 or 3) h w
				if ground_truth.shape[1] == 1:
					ground_truth = ground_truth.tile(1, 3, 1, 1)  # b 3 h w

				# Retrieving FFT phase and magnitude
				fft_img = fft.fftshift(fft.fft2(output_img, norm='ortho'))
				fft_img_phase = torch.angle(fft_img)
				fft_img_phase = (fft_img_phase/torch.pi + 1)/2  # clamp to [0, 1]
				fft_img_mag = torch.abs(fft_img)

				# Converting for display
				fft_img_phase = fft_img_phase.mean(1, keepdim=True).repeat(1, output_img.shape[1], 1, 1)
				fft_img_mag = fft_img_mag.mean(1, keepdim=True).repeat(1, output_img.shape[1], 1, 1)

				# Creating visualized localized attention maps as colour-blended splats about each cell's position
				# Each cell's local attention map is colour-coded based on the cell's position (e.g., top-left
				# cell's 3x3 attention map is blue). Overlapping maps are colour-averaged.
				if 'ViT' in cfg.model._target_:
					if iters_so_far > 0:
						attn_maps = [
							viz_attn_maps(layer[0].fn.attn_maps, attn_size, output_img,
										blend=cfg.viz_attn_maps.blend_with_output,
										brighten=cfg.viz_attn_maps.brighten_factor)
							for layer in model.transformer.layers
						]
					else:
						attn_maps = [
							torch.zeros(b*cfg.model.heads, 3, h, w, device=device) for _ in model.transformer.layers
						]
					attn_maps_img = draw_msg(make_grid(attn_maps[0], nrow=batch_size, pad_value=1),
											'layer 1 heads', 'prepend')
					for j in range(1, len(attn_maps)):
						_attn_maps_img = draw_msg(
							make_grid(attn_maps[j], nrow=batch_size, pad_value=1), f'layer {j+1} heads', 'prepend'
						)
						attn_maps_img = torch.cat([attn_maps_img, _attn_maps_img], 1)

				# Making image grid of above images
				main_img = make_grid(torch.cat([masked_x, output_img, ground_truth], 0), nrow=batch_size, pad_value=1)
				main_img = draw_msg(main_img, 'input, out, gt', 'prepend')
				fourier_img = make_grid(torch.cat([fft_img_mag, fft_img_phase], 0), nrow=batch_size, pad_value=1)
				fourier_img = draw_msg(fourier_img, 'fourier analysis', 'prepend')
				hidden_img_pos = make_grid(hidden_img_pos, nrow=batch_size, pad_value=1)
				hidden_img_pos = draw_msg(hidden_img_pos, f'hidden pos (pca {num_hidden}->3)', 'prepend')
				hidden_img_neg = make_grid(hidden_img_neg, nrow=batch_size, pad_value=1)
				hidden_img_neg = draw_msg(hidden_img_neg, f'hidden neg (pca {num_hidden}->3)', 'prepend')
				if 'ViT' in cfg.model._target_:
					final_img = torch.cat([main_img, fourier_img, attn_maps_img, hidden_img_pos, hidden_img_neg], 1)
				else:
					final_img = torch.cat([main_img, fourier_img, hidden_img_pos, hidden_img_neg], 1)
				final_img = draw_msg(final_img, f'iteration {iters_so_far}', 'append')
				final_img = to_nhwc(final_img).squeeze(0).cpu()

				# Add grid image for current frame to VideoWriter. It will automatically convert to uint8 (0, 255)
				vid.add(final_img)

				# Storing inputs and outputs to be used for visualization later
				if cfg.viz_for_paper.enabled:
					if (k == 0 or
						iters_so_far in list(cfg.viz_for_paper.ca_iters_to_save) or
						'all' in list(cfg.viz_for_paper.ca_iters_to_save)):
						all_input_imgs.append(masked_x)
						all_output_imgs.append(output_img)
						all_gt_imgs.append(ground_truth)
						if 'ViT' in cfg.model._target_:
							attn_maps = torch.cat(attn_maps, 0)  # (l heads b) c h w
							attn_maps = rearrange(
								attn_maps,
								'(l heads b) c h w -> b c (l heads h) w',
								b=batch_size,
								l=len(model.transformer.layers)
							)
							all_attn_maps.append(attn_maps)
						saved_so_far += 1

				# Inject new input every N frames
				if (k+1) % cfg.switch_up.frame_time == 0:
					x, _ = next(loader)
					x = x.to(device)
					masked_x = random_mask(x, p=cfg.experiment.masking.inf.prob,
										  mask_type=cfg.experiment.masking.inf.type,
										  patch_shape=cfg.experiment.masking.inf.patch_shape,
										  random_seed=cfg.experiment.random_seed+k+1, device=device)
					if cfg.completely_mask_input:
						masked_x *= 0.0
					if hasattr(model, 'patchify'):
						cells[:, pe_dim:pe_dim+in_dim] = model.patchify(masked_x.clone())
					else:
						cells[:, pe_dim:pe_dim+in_dim] = masked_x.clone()

		# Creating and saving images designed for visualizing for paper
		if cfg.viz_for_paper.enabled:
			for j in trange(batch_size, desc='Saving images in minibatch...'):
				_all_input_imgs = torch.stack([all_input_imgs[k][j] for k in range(saved_so_far)], 0)
				input_img = make_grid(_all_input_imgs, nrow=saved_so_far, pad_value=1)
				_all_output_imgs = torch.stack([all_output_imgs[k][j] for k in range(saved_so_far)], 0)
				output_img = make_grid(_all_output_imgs, nrow=saved_so_far, pad_value=1)
				_all_gt_imgs = torch.stack([all_gt_imgs[k][j] for k in range(saved_so_far)], 0)
				gt_img = make_grid(_all_gt_imgs, nrow=saved_so_far, pad_value=1)
				if 'ViT' in cfg.model._target_:
					_all_attn_maps = torch.stack([all_attn_maps[k][j] for k in range(saved_so_far)], 0)
					attn_img = make_grid(_all_attn_maps, nrow=saved_so_far, pad_value=1)
					img = torch.cat([input_img, output_img, gt_img, attn_img], 1)
				else:
					img = torch.cat([input_img, output_img, gt_img], 1)

				# Save to disk. It will automatically convert to uint8 (0, 255).
				img_fname = str(imgs_save_folder / f'output_{j:03}.png')
				imwrite(img_fname, img)
			LOGGER.info('Inference output saved images path: %s', imgs_save_folder)

		LOGGER.info('Inference video output path: %s', vid_fname)
	return 1


if __name__ == '__main__':
	inference()
