# Supplementary material
Source: ML conference proceedings conference paper supplement (https://proceedings.neurips.cc/paper_files/paper/2022/hash/361e5112d2eca09513bbd266e4b2d2be-Abstract.html)
Supplement: Supplementary file 1 [file 361e5112d2eca09513bbd266e4b2d2be-Supplemental-Conference.zip › supplementary/code/masked_autoencoding/src/__init__.py]

from pathlib import Path
import sys
if str(Path(__file__).parent.parent.parent.resolve()) not in sys.path:
	sys.path.insert(1, str(Path(__file__).parent.parent.parent.resolve()))
