# Supplementary material
Source: ML conference proceedings conference paper supplement (https://proceedings.neurips.cc/paper_files/paper/2022/hash/361e5112d2eca09513bbd266e4b2d2be-Abstract.html)
Supplement: Supplementary file 1 [file 361e5112d2eca09513bbd266e4b2d2be-Supplemental-Conference.zip › supplementary/code/masked_autoencoding/src/datasets.py]

import os
import pandas as pd
import torch
from torch.utils.data.dataset import Dataset
from pathlib import Path
import numpy as np
import imageio
from PIL import Image

from collections import defaultdict

from tqdm.autonotebook import tqdm


IMG_DIM = 100
NUM_CLASSES = 61
BANDS = 4

class LandCoverRepDataset(Dataset):
	"""
	The Land Cover Representation dataset.
	Imagery is from the USDA's National Agriculture Imagery Program (NAIP), which provides aerial imagery for public
	use that has four spectral bands (red (R), green (G), blue (B), and infrared (N)) at 0.6 m ground resolution.
	The output is image-level land cover classification (61 possible classes), where labels are generated from a 
	high-quality USDA dataset [1]. Since our 100x100 px NAIP tiles and the USDA land cover dataset are not perfectly 
	aligned, the land cover class used for the label is the mode across pixels in the tile.
	
	This dataset contains 100k tile triplets, with each triplet identified by its index and "anchor", "neighbor", or 
	"distant". However, for the autoencoding task, triplets will be separated, meaning 300k tiles in total.

	Input (x):
		5 x 100 x 100 RGBN (red (R), green (G), blue (B), infrared (N), land cover segmentation mask) satellite image.
	Label (y):
		y is one of 61 land cover classes

	Website: https://sustainlab-group.github.io/sustainbench/docs/datasets/sdg15/land_cover_representation.html
	
	Original publication:
	@article{jean2019tile2vec,
		Author = {Jean, Neal and Wang, Sherrie and Samar, Anshul and Azzari, George and Lobell, David and Ermon, Stefano},
		Journal = {Proceedings of the AAAI Conference on Artificial Intelligence},
		Month = {Jul.},
		Number = {01},
		Pages = {3967-3974},
		Title = {Tile2Vec: Unsupervised Representation Learning for Spatially Distributed Data},
		Volume = {33},
		Year = {2019}}

	References:
		[1] National Agricultural Statistics Service. USDA National Agricultural Statistics Service Cropland Data 
		Layer. Published crop-specific data layer [Online], 2018. URL https://nassgeodata.594gmu.edu/CropScape/.
	
	License:
		Distributed under the SustainBench MIT License.
		https://github.com/sustainlab-group/sustainbench/blob/main/LICENSE
	"""

	_dataset_name = 'land_cover_representation'

	def __init__(self, root='data', download=False):
		root = self.root = os.path.expanduser(root)
		self._data_dir = self.initialize_data_dir(root, download)
		self._tile_dir = os.path.join(self._data_dir, 'tile_triplets')

		self._metadata_fields = ['fileName', 'landCover', 'split', 'splitStr']
		self._metadata_array = pd.read_csv(os.path.join(self.data_dir, 'metadata.csv'))
		self._metadata_map = \
			{'landCover': {
				1: 'Corn',
				2: 'Cotton',
				3: 'Rice',
				4: 'Sorghum',
				12: 'Sweet Corn',
				21: 'Barley',
				22: 'Durum Wheat',
				23: 'Spring Wheat',
				24: 'Winter Wheat',
				27: 'Rye',
				28: 'Oats',
				33: 'Safflower',
				36: 'Alfalfa',
				37: 'Other Hay/Non Alfalfa',
				42: 'Dry Beans',
				44: 'Other Crops',
				48: 'Watermelons',
				49: 'Onions',
				53: 'Peas',
				54: 'Tomatoes',
				59: 'Sod/Grass Seed',
				61: 'Fallow/Idle Cropland',
				66: 'Cherries',
				67: 'Peaches',
				69: 'Grapes',
				71: 'Other Tree Crops',
				72: 'Citrus',
				74: 'Pecans',
				75: 'Almonds',
				76: 'Walnuts',
				77: 'Pears',
				111: 'Open Water',
				121: 'Developed/Open Space',
				122: 'Developed/Low Intensity',
				123: 'Developed/Med Intensity',
				124: 'Developed/High Intensity',
				131: 'Barren',
				141: 'Deciduous Forest',
				142: 'Evergreen Forest',
				152: 'Shrubland',
				176: 'Grassland/Pasture',
				190: 'Woody Wetlands',
				195: 'Herbaceous Wetlands',
				204: 'Pistachios',
				205: 'Triticale',
				206: 'Carrots',
				207: 'Asparagus',
				208: 'Garlic',
				209: 'Cantaloupes',
				211: 'Olives',
				212: 'Oranges',
				213: 'Honeydew Melons',
				217: 'Pomegranates',
				218: 'Nectarines',
				220: 'Plums',
				225: 'Dbl Crop WinWht/Corn',
				226: 'Dbl Crop Oats/Corn',
				227: 'Leccuce',
				236: 'Dbl Crop WinWht/Sorghum',
				237: 'Dbl Crop Barley/Corn',
				242: 'Blueberries'
			}}

		self._split_dict = {'train': 0, 'val': 1, 'test': 2}
		self._split_names = {'train': 'Train', 'val': 'Validation', 'test': 'Test'}
		self._split_array = self._metadata_array['split'].values

		self._filenames = self._metadata_array['fileName'].values

		# y_array stores idx ids corresponding to land cover class.
		self._y_array = torch.from_numpy(self._metadata_array['landCover'].values)
		self._y_size = 1

		self._n_classes = NUM_CLASSES
		self._original_resolution = IMG_DIM

		self.check_init()

	def __len__(self):
		return len(self.y_array)

	def __getitem__(self, idx):
		# Any transformations are handled by the LandCoverRepSubset
		# since different subsets (e.g., train vs test) might have different transforms
		x = self.get_input(idx)
		y = self.y_array[idx]
		return x, y

	def get_input(self, idx):
		"""
		Args:
			- idx (int): Index of a data point
		Output:
			- x (Tensor): Input features of the idx-th data point
		"""
		data = np.load(os.path.join(self._tile_dir, self._filenames[idx]))
		return data

	def get_subset(self, split, frac=1.0, transform=None):
		"""
		Args:
			- split (str): Split identifier, e.g., 'train', 'val', 'test'.
						   Must be in self.split_dict.
			- frac (float): What fraction of the split to randomly sample.
							Used for fast development on a small dataset.
			- transform (function): Any data transformations to be applied to the input x.
		Output:
			- subset (LandCoverRepSubset): A (potentially subsampled) subset of the LandCoverRepDataset.
		"""
		if split not in self.split_dict:
			raise ValueError(f"Split {split} not found in dataset's split_dict.")
		split_mask = self.split_array == self.split_dict[split]
		split_idx = np.where(split_mask)[0]
		if frac < 1.0:
			num_to_retain = int(np.round(float(len(split_idx)) * frac))
			split_idx = np.sort(np.random.permutation(split_idx)[:num_to_retain])
		subset = LandCoverRepSubset(self, split_idx, transform)
		return subset

	def check_init(self):
		"""
		Convenience function to check that the SustainBenchDataset is properly configured.
		"""
		required_attrs = ['_dataset_name', '_data_dir',
						  '_split_array',
						  '_y_array', '_y_size',
						  '_metadata_fields', '_metadata_array']
		for attr_name in required_attrs:
			assert hasattr(self, attr_name), f'LandCoverRepDataset is missing {attr_name}.'

		# Check that data directory exists
		if not os.path.exists(self.data_dir):
			raise ValueError(
				f'{self.data_dir} does not exist yet. Please generate the dataset first.')

		# Check splits
		assert self.split_dict.keys()==self.split_names.keys()
		assert 'train' in self.split_dict
		assert 'val' in self.split_dict

		assert isinstance(self.y_array, torch.Tensor), 'y_array must be a torch.Tensor'

		# Check that dimensions match
		assert len(self.y_array) == len(self.metadata_array)
		assert len(self.y_array.shape) == self.y_size
		assert len(self.split_array) == len(self.metadata_array)

		# Check metadata
		assert len(self.metadata_array.shape) == 2
		assert len(self.metadata_fields) == self.metadata_array.shape[1]

	@property
	def dataset_name(self):
		"""
		A string that identifies the dataset, e.g., 'amazon', 'camelyon17'.
		"""
		return self._dataset_name

	@property
	def data_dir(self):
		"""
		The full path to the folder in which the dataset is stored.
		"""
		return self._data_dir

	@property
	def collate(self):
		"""
		Torch function to collate items in a batch.
		By default returns None -> uses default torch collate.
		"""
		return getattr(self, '_collate', None)

	@property
	def split_scheme(self):
		"""
		A string identifier of how the split is constructed,
		e.g., 'standard', 'in-dist', 'user', etc.
		"""
		return self._split_scheme

	@property
	def split_dict(self):
		"""
		A dictionary mapping splits to integer identifiers (used in split_array),
		e.g., {'train': 0, 'val': 1, 'test': 2}.
		Keys should match up with split_names.
		"""
		return getattr(self, '_split_dict', None)

	@property
	def split_names(self):
		"""
		A dictionary mapping splits to their pretty names,
		e.g., {'train': 'Train', 'val': 'Validation', 'test': 'Test'}.
		Keys should match up with split_dict.
		"""
		return getattr(self, '_split_names', None)

	@property
	def split_array(self):
		"""
		An array of integers, with split_array[i] representing what split the i-th data point
		belongs to.
		"""
		return self._split_array

	@property
	def y_array(self):
		"""
		A Tensor of targets (e.g., labels for classification tasks),
		with y_array[i] representing the target of the i-th data point.
		y_array[i] can contain multiple elements.
		"""
		return self._y_array

	@property
	def y_size(self):
		"""
		The number of dimensions/elements in the target, i.e., len(y_array[i]).
		For standard classification/regression tasks, y_size = 1.
		For multi-task or structured prediction settings, y_size > 1.
		Used for logging and to configure models to produce appropriately-sized output.
		"""
		return self._y_size

	@property
	def n_classes(self):
		"""
		Number of classes for single-task classification datasets.
		Used for logging and to configure models to produce appropriately-sized output.
		None by default.
		Leave as None if not applicable (e.g., regression or multi-task classification).
		"""
		return getattr(self, '_n_classes', None)

	@property
	def is_classification(self):
		"""
		Boolean. True if the task is classification, and false otherwise.
		Used for logging purposes.
		"""
		return (self.n_classes is not None)

	@property
	def metadata_fields(self):
		"""
		A list of strings naming each column of the metadata table, e.g., ['hospital', 'splitStr'].
		"""
		return self._metadata_fields

	@property
	def metadata_array(self):
		"""
		A Pandas DataFrame of metadata, with the i-th row representing the metadata associated with
		the i-th data point. The columns correspond to the metadata_fields defined above.
		"""
		return self._metadata_array

	@property
	def metadata_map(self):
		"""
		An optional dictionary that, for each metadata field, contains a list that maps from
		integers (in metadata_array) to a string representing what that integer means.
		This is only used for logging, so that we print out more intelligible metadata values.
		Each key must be in metadata_fields.
		For example, if we have
			metadata_fields = ['landCover', 'y']
			metadata_map = {'landCover': {61: 'Fallow/Idle Cropland', 66: 'Cherries'}}
		then if metadata_array['landCover'][i] == 61, the i-th data point belongs to the 'Fallow/Idle Cropland' class
		while if metadata_array['landCover'][i] == 66, it belongs to the 'Cherries' class.
		"""
		return getattr(self, '_metadata_map', None)

	@property
	def original_resolution(self):
		"""
		Original image resolution for image datasets.
		"""
		return getattr(self, '_original_resolution', None)

	def initialize_data_dir(self, root_dir, download):
		os.makedirs(root_dir, exist_ok=True)

		data_dir = os.path.join(root_dir, f'{self.dataset_name}')

		# If the data_dir exists but it is not empty we assume the dataset is correctly set up
		if os.path.exists(data_dir) and len(os.listdir(data_dir)) > 0:
			return data_dir

		if download is True:
			msg = (f'You need to download the {self.dataset_name} dataset zipfile externally and place them in the root'
					'directory. They can be downloaded at https://sustainlab-group.github.io/sustainbench/docs/datasets'
					'/sdg15/land_cover_representation.html.')
			raise RuntimeError(msg)

		return data_dir


class LandCoverRepSubset(LandCoverRepDataset):
	def __init__(self, dataset, indices, transform):
		"""
		This acts like torch.utils.data.Subset.
		We pass in transform explicitly because it can potentially vary at
		training vs. test time, if we're using data augmentation.
		"""
		self.dataset = dataset
		self.indices = indices
		inherited_attrs = ['_dataset_name', '_data_dir', '_collate',
						   '_split_dict', '_split_names',
						   '_y_size', '_n_classes',
						   '_metadata_fields', '_metadata_map']
		for attr_name in inherited_attrs:
			if hasattr(dataset, attr_name):
				setattr(self, attr_name, getattr(dataset, attr_name))
		self.transform = transform

	def __getitem__(self, idx):
		x, y = self.dataset[self.indices[idx]]
		if self.transform is not None:
			x = self.transform(x)
		return x, y

	def __len__(self):
		return len(self.indices)

	@property
	def split_array(self):
		return self.dataset.split_array[self.indices]

	@property
	def y_array(self):
		return self.dataset.y_array[self.indices]

	@property
	def metadata_array(self):
		return self.dataset.metadata_array[self.indices]


class TinyImageNetPaths:
	"""
	Creates a paths data structure for Tiny ImageNet.

	Args:
		root_dir: Where the data is located. Contains 'test', 'train', and 'val' folders, and 'wnids.txt', 'words.txt'
		files
		download: Download if the data is not there

	Members:
		paths: Dict containing 'train', 'val', 'test' keys with corresponding lists containing image paths and
		relevant metadata
		nids: List of IDs corresponding to the image description for each image (which contains >= 1 labels/words)
		nid_to_words: Dict for converting nid to word(s) description (e.g., 'n15280346' -> ['miles per hour', 'mph'])

	"""
	url = 'http://cs231n.stanford.edu/tiny-imagenet-200.zip'
	def __init__(self, root_dir, download=False):
		if download:
			raise NotImplementedError(f'Download is not yet implemented. Please, go to {self.url} urself.')
		self.root_dir = Path(root_dir)
		train_path = self.root_dir / 'train'
		val_path = self.root_dir / 'val'
		test_path = self.root_dir / 'test'

		wnids_path = self.root_dir / 'wnids.txt'
		words_path = self.root_dir / 'words.txt'

		self._make_paths(train_path, val_path, test_path, wnids_path, words_path)

	def _make_paths(self, train_path, val_path, test_path,
					wnids_path, words_path):
		self.nids = []
		with open(wnids_path, 'r') as idf:
			for nid in idf:
				nid = nid.strip()
				self.nids.append(nid)
		self.nid_to_words = defaultdict(list)
		with open(words_path, 'r') as wf:
			for line in wf:
				nid, labels = line.split('\t')
				labels = list(map(lambda x: x.strip(), labels.split(',')))
				self.nid_to_words[nid].extend(labels)

		self.paths = {
			'train': [],  # [(img_path, id, nid, box)]
			'val': [],  # [(img_path, id, nid, box)]
			'test': []  # [img_path]
		}

		# Get the test paths
		self.paths['test'] = list(map(lambda x: str(test_path / 'images' / x), (test_path / 'images').iterdir()))

		# Get the validation paths and labels
		with open(val_path / 'val_annotations.txt') as valf:
			for line in valf:
				fname, nid, x0, y0, x1, y1 = line.split()
				fname = str(val_path / 'images' / fname)
				bbox = int(x0), int(y0), int(x1), int(y1)
				label_id = self.nids.index(nid)
				self.paths['val'].append((fname, label_id, nid, bbox))

		# Get the training paths
		train_nids = os.listdir(train_path)
		for nid in train_nids:
			anno_path = train_path / nid / (nid + '_boxes.txt')
			imgs_path = train_path / nid / 'images'
			label_id = self.nids.index(nid)
			with open(anno_path, 'r') as annof:
				for line in annof:
					fname, x0, y0, x1, y1 = line.split()
					fname = str(imgs_path / fname)
					bbox = int(x0), int(y0), int(x1), int(y1)
					self.paths['train'].append((fname, label_id, nid, bbox))

class TinyImageNetDataset(Dataset):
	"""
	Data structure for the Tiny ImageNet dataset.

	Tiny ImageNet has 200 classes and each class has 500 training images, 50 validation images, and 50 test images.
	The images are down-sampled to 64 x 64 pixels from their original ImageNet resolution. Overall, there are 100k
	training images, 10k validation images, and 10k test images.

	TinyImageNetPath
	├── test
	│   └── images
	│       ├── test_0.JPEG
	│       ├── t...
	│       └── ...
	├── train
	│   ├── n01443537
	│   │   ├── images
	│   │   │   ├── n01443537_0.JPEG
	│   │   │   ├── n...
	│   │   │   └── ...
	│   │   └── n01443537_boxes.txt
	│   ├── n01629819
	│   │   ├── images
	│   │   │   ├── n01629819_0.JPEG
	│   │   │   ├── n...
	│   │   │   └── ...
	│   │   └── n01629819_boxes.txt
	│   ├── n...
	│   │   ├── images
	│   │   │   ├── ...
	│   │   │   └── ...
	├── val
	│   ├── images
	│   │   ├── val_0.JPEG
	│   │   ├── v...
	│   │   └── ...
	│   └── val_annotations.txt
	├── wnids.txt
	└── words.txt

	Args:
		root: Root directory for the data
		split: One of 'train', 'test', or 'val'
		preload: Preload into memory
		load_transform: Transformation to use at the preload time
		load_target_transform: Target transformation to use at the preload time
		transform: Transformation to use at the retrieval time
		target_transform: A function/transform that takes in the target and transforms it.
		download: Download the dataset

	Members:
		tinp: Instance of the TinyImageNetPaths
		data: Image data
		targets: Label data
		classes: List of IDs corresponding to the image description for each image (which contains >= 1 labels/words)
		class_to_words: Dict for converting nid to word(s) description (e.g., 'n15280346' -> ['miles per hour', 'mph'])
		class_to_idx: Dict for converting nid/class to index. The indices range from [0, C) where C is the number of 
		classes. 
	"""
	def __init__(
		self,
		root,
		split='train',
		preload=False,
		load_transform=None,
		load_target_transform=None,
		transform=None,
		target_transform=None,
		download=False,
		max_samples=None
	):
		self.transform = transform
		self.target_transform = target_transform
		self.tinp = TinyImageNetPaths(root, download)
		self.split = split
		self.label_idx = 1  # from (image, id, nid, box)
		self.preload = preload
		self.transform_results = dict()

		self.IMAGE_SHAPE = (64, 64, 3)

		self.data = []
		self.targets = []

		self.classes = self.tinp.nids
		self.class_to_words = self.tinp.nid_to_words
		self.class_to_idx = {_class: i for i, _class in enumerate(self.classes)}

		self.max_samples = max_samples
		self.samples = self.tinp.paths[split]
		self.samples_num = len(self.samples)

		if self.max_samples is not None:
			self.samples_num = min(self.max_samples, self.samples_num)
			self.samples = np.random.permutation(self.samples)[:self.samples_num]

		if self.preload:
			load_desc = "Preloading {} data...".format(split)
			self.data = np.zeros((self.samples_num,) + self.IMAGE_SHAPE, dtype=np.uint8)
			self.targets = None if split == 'test' else np.ones((self.samples_num,), dtype=np.int64)*-1
			for idx in tqdm(range(self.samples_num), desc=load_desc):
				s = self.samples[idx]
				img = imageio.imread(s) if self.split == 'test' else imageio.imread(s[0])
				if img.ndim == 2:
					img = np.expand_dims(img, -1)
				if img.shape[-1] == 1:
					img = np.tile(img, (1, 1, 3))
				self.data[idx] = img
				if split != 'test':
					self.targets[idx] = s[self.label_idx]
			if load_transform:
				self.data = load_transform(self.data)
			if load_target_transform and self.targets is not None:
				self.targets = load_target_transform(self.targets)

	def __len__(self):
		return self.samples_num

	def __getitem__(self, idx):
		if self.preload:
			img = self.data[idx]
			target = None if self.split == 'test' else self.targets[idx]
		else:
			s = self.samples[idx]
			img = imageio.imread(s) if self.split == 'test' else imageio.imread(s[0])
			if img.ndim == 2:
				img = np.expand_dims(img, -1)
			if img.shape[-1] == 1:
				img = np.tile(img, (1, 1, 3))
			target = None if self.split == 'test' else s[self.label_idx]

		# Doing this so that it is consistent with all other datasets to return a PIL Image
		img = Image.fromarray(img)

		if self.transform:
			img = self.transform(img)

		if self.target_transform and target is not None:
			target = self.target_transform(target)

		if target is None:
			return img, np.array(-1, dtype=np.int64)
		else:
			return img, target

"""
Custom torchvision transforms
"""
import torchvision.datasets as datasets
import torchvision.transforms as T

from einops import rearrange

class RandomMask(object):
	"""
	Randomly drop out parts of the input image. All channels are included.
	"""
	def __init__(self, p=0.5):
		assert isinstance(p, float)
		assert p >= 0 and p <= 1, "probability p must be between 0 and 1"
		self.p = p
	
	def __call__(self, x):
		_, h, w = x.shape
		mask = (torch.rand(1, h, w)+(1-self.p)).floor()
		masked_x = mask*x
		return masked_x

def random_mask(x, p=0.5, patch_shape=(1, 1), mask_type='dropout', random_seed=None, device='cpu'):
	assert p >= 0 and p <= 1, 'probability p must be between 0 and 1'
	assert x.shape[2] % patch_shape[0] == 0 and x.shape[3] % patch_shape[1] == 0, 'Image dimensions must be divisible by the patch size.'
	x = rearrange(x, 'b c (h p1) (w p2) -> b (p1 p2 c) h w', p1=patch_shape[0], p2=patch_shape[1])
	b, _, h, w = x.shape
	if random_seed is not None:
		# for deterministic and reproducible masking
		torch.manual_seed(random_seed)
		torch.cuda.manual_seed(random_seed)
	mask = (torch.rand(b, 1, h, w, device=device)+(1-p)).floor()
	if mask_type == 'noise':
		if random_seed is not None:
			# for deterministic and reproducible masking
			torch.manual_seed(random_seed)
			torch.cuda.manual_seed(random_seed)
		noise = (1 - mask) * torch.randn_like(mask, device=device)
		masked_x = rearrange(mask*x+noise, 'b (p1 p2 c) h w -> b c (h p1) (w p2)', p1=patch_shape[0], p2=patch_shape[1])
	elif mask_type == 'dropout':
		masked_x = rearrange(mask*x, 'b (p1 p2 c) h w -> b c (h p1) (w p2)', p1=patch_shape[0], p2=patch_shape[1])
	return masked_x
class GetBands(object):
	"""
	Gets the first X bands of the tile.
	"""
	def __init__(self, bands):
		assert bands >= 0, 'Must get at least 1 band'
		self.bands = bands

	def __call__(self, x):
		# Tiles are already in [c, w, h] order
		return x[:self.bands,:,:]

def get_train_val_datasets(dataset_name, dataset_root, train_size, validation_size):
	if dataset_name == 'LandCoverRep':
		transforms = T.Compose([T.ToTensor(), GetBands(3), T.RandomCrop(train_size),
								T.RandomHorizontalFlip(), T.RandomVerticalFlip()])
		dataset = LandCoverRepDataset(root=dataset_root)
		train_dataset = dataset.get_subset('train', transform=transforms)
		validation_dataset = \
			dataset.get_subset('val', transform=T.Compose([T.ToTensor(), GetBands(3), T.CenterCrop(validation_size)]))
	elif dataset_name == 'MNIST':
		train_dataset = datasets.MNIST(root=dataset_root, train=True,
									   transform=T.Compose([
										   T.ToTensor(),
										   T.Resize(train_size)
									   ]))
		validation_dataset = datasets.MNIST(root=dataset_root, train=False,
											transform=T.Compose([
												T.ToTensor(),
												T.Resize(validation_size)
											]))
	elif dataset_name == 'FashionMNIST':
		train_dataset = datasets.FashionMNIST(root=dataset_root, train=True,
									   		  transform=T.Compose([
													T.ToTensor(),
													T.Resize(train_size, antialias=True)
											  ]))
		validation_dataset = datasets.FashionMNIST(root=dataset_root, train=False,
												   transform=T.Compose([
														T.ToTensor(),
														T.Resize(validation_size, antialias=True)
												   ]))
	elif dataset_name == 'CelebA':
		train_dataset = datasets.CelebA(root=dataset_root, split='train',
										transform=T.Compose([
											T.ToTensor(),
											T.Resize(train_size, antialias=True)
										]))
		validation_dataset = datasets.CelebA(root=dataset_root, split='valid',
											 transform=T.Compose([
												T.ToTensor(),
												T.Resize(validation_size, antialias=True)
											 ]))
	elif dataset_name == 'CIFAR10':
		train_dataset = datasets.CIFAR10(root=dataset_root, train=True,
										 transform=T.Compose([
											 T.ToTensor(),
											 T.Resize(train_size, antialias=True)
										 ]))
		validation_dataset = datasets.CIFAR10(root=dataset_root, train=False,
											  transform=T.Compose([
												  T.ToTensor(),
												  T.Resize(validation_size, antialias=True)
											  ]))
	elif dataset_name == 'TinyImageNet':
		train_dataset = TinyImageNetDataset(root=dataset_root, split='train',
										 	transform=T.Compose([
												T.ToTensor(),
												T.RandomHorizontalFlip(),
												T.Resize(train_size, antialias=True)
										   ]), preload=True)
		validation_dataset = TinyImageNetDataset(root=dataset_root, split='val',
												 transform=T.Compose([
													T.ToTensor(),
													T.Resize(validation_size, antialias=True)
												]), preload=True)
	else:
		raise RuntimeError(
			'Dataset not supported.'
			'Pick \'LandCoverRep\', \'MNIST\', \'FashionMNIST\', \'CelebA\', \'CIFAR10\', or \'TinyImageNet\'.'
		)
	return train_dataset, validation_dataset

def get_inf_dataset(dataset_name, dataset_root, inference_size):
	if dataset_name == 'LandCoverRep':
		transforms = T.Compose([T.ToTensor(), GetBands(3), T.CenterCrop(inference_size)])
		dataset = LandCoverRepDataset(root=dataset_root)
		inf_dataset = dataset.get_subset('test', transform=transforms)
	elif dataset_name == 'MNIST':
		inf_dataset = datasets.MNIST(root=dataset_root, train=False,
									 transform=T.Compose([T.ToTensor(), T.Resize(inference_size)]))
	elif dataset_name == 'FashionMNIST':
		inf_dataset = datasets.FashionMNIST(root=dataset_root, train=False,
									 		transform=T.Compose([
												 T.ToTensor(),
												 T.Resize(inference_size, antialias=True)
											]))
	elif dataset_name == 'CelebA':
		inf_dataset = datasets.CelebA(root=dataset_root, split='test',
									  transform=T.Compose([T.ToTensor(), T.Resize(inference_size, antialias=True)]))
	elif dataset_name == 'CIFAR10':
		inf_dataset = datasets.CIFAR10(root=dataset_root, train=False,
									   transform=T.Compose([T.ToTensor(), T.Resize(inference_size, antialias=True)]))
	elif dataset_name == 'TinyImageNet':
		inf_dataset = TinyImageNetDataset(root=dataset_root, split='test',
										  transform=T.Compose([T.ToTensor(), T.Resize(inference_size, antialias=True)]))
	else:
		raise RuntimeError(
			'Dataset not supported.'
			'Pick \'LandCoverRep\', \'MNIST\', \'FashionMNIST\', \'CelebA\', \'CIFAR10\', or \'TinyImageNet\'.'
		)
	return inf_dataset
