# Supplementary material
Source: ML conference proceedings conference paper supplement (https://proceedings.neurips.cc/paper_files/paper/2022/hash/361e5112d2eca09513bbd266e4b2d2be-Abstract.html)
Supplement: Supplementary file 1 [file 361e5112d2eca09513bbd266e4b2d2be-Supplemental-Conference.zip › supplementary/code/masked_autoencoding/src/deq/grad.py]

# Taken from https://github.com/locuslab/deq-flow/blob/59bae7112877dbf9e70fae67e4e469c33e1c9c11/core/lib/grad.py
import torch
from torch import autograd

from src.deq.solvers import anderson, broyden


def make_pair(target, source):
	if len(target) == len(source):
		return source
	elif len(source) == 1:
		return [source[0] for _ in range(len(target))]
	else:
		raise ValueError('Unable to align the arg squence!')


def backward_factory(
		grad_type='ift',
		safe_ift=False,
		b_solver=anderson,
		b_solver_kwargs=dict(),
		sup_all=False,
		tau=1.0):
	"""
	[2019-NeurIPS] Deep Equilibrium Models
	[2021-ICLR] Is Attention Better Than Matrix Decomposition?
	[2021-NeurIPS] On Training Implicit Models
	[2022-AAAI] JFB: Jacobian-Free Backpropagation for Implicit Networks

	This function implements a factory for the backward pass of implicit deep learning,
	e.g., DEQ (implicit models), Hamburger (optimization layer), etc.
	It now supports IFT, 1-step Grad, and Phantom Grad.

	Kwargs:
		grad_type (string, int):
			grad_type should be ``ift`` or an int. Default ``ift``.
			Set to ``ift`` to enable the implicit differentiation mode.
			When passing a number k to this function, it runs UPG with steps k and damping tau.
		safe_ift (bool):
			Replace the O(1) hook implementeion with a safer one. Default ``False``.
			Set to ``True`` to avoid the (potential) segment fault (under previous versions of Pytorch).
		b_solver (type):
			Solver for the IFT backward pass. Default ``anderson``.
			Supported solvers: anderson, broyden.
		b_solver_kwargs (dict):
			Colllection of backward solver kwargs, e.g.,
				threshold (int), max steps for the backward solver,
				stop_mode (string), criterion for convergence,
				etc.
			See solver.py to check all the kwargs.
		sup_all (bool):
			Indicate whether to supervise all the trajectories by Phantom Grad.
			Set ``True`` to return all trajectory in Phantom Grad.
		tau (float):
			Damping factor for Phantom Grad. Default ``1.0``.
			0.5 is recommended for CIFAR-10. 1.0 for DEQ flow.
			For DEQ flow, the gating function in GRU naturally produces adaptive tau values.

	Return:
		A gradient functor for implicit deep learning.
		Args:
			trainer (nn.Module): the module that employs implicit deep learning.
			z_pred (torch.Tensor): latent state to run the backward pass.
			func (type): function that defines the ``f`` in ``z = f(z)``.

		Return:
			(list(torch.Tensor)): a list of tensors that tracks the gradient info.
	"""

	if grad_type == 'ift':
		assert b_solver in [anderson, broyden]

		if safe_ift:
			def plain_ift_grad(trainer, z_pred, func):
				z_pred = z_pred.requires_grad_()
				new_z_pred = func(z_pred) # 1-step grad for df/dtheta

				z_pred_copy = new_z_pred.clone().detach().requires_grad_()
				new_z_pred_copy = func(z_pred_copy)
				def backward_hook(grad):
					result = b_solver(
						lambda y: autograd.grad(new_z_pred_copy, z_pred_copy, y, retain_graph=True)[0] + grad,
						torch.zeros_like(grad),
						**b_solver_kwargs
					)
					return result['result']
				new_z_pred.register_hook(backward_hook)

				return [new_z_pred]
			return plain_ift_grad
		else:
			def hook_ift_grad(trainer, z_pred, func):
				z_pred = z_pred.requires_grad_()
				new_z_pred = func(z_pred) # 1-step grad for df/dtheta

				def backward_hook(grad):
					if trainer.hook is not None:
						trainer.hook.remove()    # To avoid infinite loop
					result = b_solver(
						lambda y: autograd.grad(new_z_pred, z_pred, y, retain_graph=True)[0] + grad,
						torch.zeros_like(grad),
						**b_solver_kwargs
					)
					return result['result']
				trainer.hook = new_z_pred.register_hook(backward_hook)

				return [new_z_pred]
			return hook_ift_grad
	else:
		assert isinstance(grad_type, int) and grad_type >= 1
		n_phantom_grad = grad_type

		if sup_all:
			def sup_all_phantom_grad(trainer, z_pred, func):
				z_out = []
				for _ in range(n_phantom_grad):
					z_pred = (1 - tau) * z_pred + tau * func(z_pred)
					z_out.append(z_pred)

				return z_out
			return sup_all_phantom_grad
		else:
			def phantom_grad(trainer, z_pred, func):
				for _ in range(n_phantom_grad):
					z_pred = (1 - tau) * z_pred + tau * func(z_pred)

				return [z_pred]
			return phantom_grad
