# Supplementary material
Source: ML conference proceedings conference paper supplement (https://proceedings.neurips.cc/paper_files/paper/2022/hash/361e5112d2eca09513bbd266e4b2d2be-Abstract.html)
Supplement: Supplementary file 1 [file 361e5112d2eca09513bbd266e4b2d2be-Supplemental-Conference.zip › supplementary/code/masked_autoencoding/src/deq/solvers.py]

# Modified based on the DEQ repo.
# Taken from https://github.com/locuslab/deq-flow/blob/59bae7112877dbf9e70fae67e4e469c33e1c9c11/core/lib/solvers.py#L209

import torch
import numpy as np
import pickle
from termcolor import colored


def _safe_norm(v):
	if not torch.isfinite(v).all():
		return np.inf
	return torch.norm(v)


def scalar_search_armijo(phi, phi0, derphi0, c1=1e-4, alpha0=1, amin=0):
	ite = 0
	phi_a0 = phi(alpha0)    # First do an update with step size 1
	if phi_a0 <= phi0 + c1*alpha0*derphi0:
		return alpha0, phi_a0, ite

	# Otherwise, compute the minimizer of a quadratic interpolant
	alpha1 = -(derphi0) * alpha0**2 / 2.0 / (phi_a0 - phi0 - derphi0 * alpha0)
	phi_a1 = phi(alpha1)

	# Otherwise loop with cubic interpolation until we find an alpha which
	# satisfies the first Wolfe condition (since we are backtracking, we will
	# assume that the value of alpha is not too small and satisfies the second
	# condition.
	while alpha1 > amin:       # we are assuming alpha>0 is a descent direction
		factor = alpha0**2 * alpha1**2 * (alpha1-alpha0)
		a = alpha0**2 * (phi_a1 - phi0 - derphi0*alpha1) - \
			alpha1**2 * (phi_a0 - phi0 - derphi0*alpha0)
		a = a / factor
		b = -alpha0**3 * (phi_a1 - phi0 - derphi0*alpha1) + \
			alpha1**3 * (phi_a0 - phi0 - derphi0*alpha0)
		b = b / factor

		alpha2 = (-b + torch.sqrt(torch.abs(b**2 - 3 * a * derphi0))) / (3.0*a)
		phi_a2 = phi(alpha2)
		ite += 1

		if (phi_a2 <= phi0 + c1*alpha2*derphi0):
			return alpha2, phi_a2, ite

		if (alpha1 - alpha2) > alpha1 / 2.0 or (1 - alpha2/alpha1) < 0.96:
			alpha2 = alpha1 / 2.0

		alpha0 = alpha1
		alpha1 = alpha2
		phi_a0 = phi_a1
		phi_a1 = phi_a2

	# Failed to find a suitable step length
	return None, phi_a1, ite


def line_search(update, x0, g0, g, nstep=0, on=True):
	"""
	`update` is the propsoed direction of update.

	Code adapted from scipy.
	"""
	tmp_s = [0]
	tmp_g0 = [g0]
	tmp_phi = [torch.norm(g0)**2]
	s_norm = torch.norm(x0) / torch.norm(update)

	def phi(s, store=True):
		if s == tmp_s[0]:
			return tmp_phi[0]    # If the step size is so small... just return something
		x_est = x0 + s * update
		g0_new = g(x_est)
		phi_new = _safe_norm(g0_new)**2
		if store:
			tmp_s[0] = s
			tmp_g0[0] = g0_new
			tmp_phi[0] = phi_new
		return phi_new
	
	if on:
		s, phi1, ite = scalar_search_armijo(phi, tmp_phi[0], -tmp_phi[0], amin=1e-2)
	if (not on) or s is None:
		s = 1.0
		ite = 0

	x_est = x0 + s * update
	if s == tmp_s[0]:
		g0_new = tmp_g0[0]
	else:
		g0_new = g(x_est)
	return x_est, g0_new, x_est - x0, g0_new - g0, ite

def rmatvec(part_Us, part_VTs, x):
	# Compute x^T(-I + UV^T)
	# x: (N, 2d, L')
	# part_Us: (N, 2d, L', threshold)
	# part_VTs: (N, threshold, 2d, L')
	if part_Us.nelement() == 0:
		return -x
	xTU = torch.einsum('bij, bijd -> bd', x, part_Us)   # (N, threshold)
	return -x + torch.einsum('bd, bdij -> bij', xTU, part_VTs)    # (N, 2d, L'), but should really be (N, 1, (2d*L'))


def matvec(part_Us, part_VTs, x):
	# Compute (-I + UV^T)x
	# x: (N, 2d, L')
	# part_Us: (N, 2d, L', threshold)
	# part_VTs: (N, threshold, 2d, L')
	if part_Us.nelement() == 0:
		return -x
	VTx = torch.einsum('bdij, bij -> bd', part_VTs, x)  # (N, threshold)
	return -x + torch.einsum('bijd, bd -> bij', part_Us, VTx)     # (N, 2d, L'), but should really be (N, (2d*L'), 1)


def broyden(f, x0, 
		threshold=50, eps=1e-3, stop_mode="rel", indexing=None,
		ls=False, name="unknown", **kwargs):
	bsz, total_hsize, seq_len = x0.size()
	g = lambda y: f(y) - y
	dev = x0.device
	alternative_mode = 'rel' if stop_mode == 'abs' else 'abs'
	
	x_est = x0           # (bsz, 2d, L')
	gx = g(x_est)        # (bsz, 2d, L')
	nstep = 0
	tnstep = 0
	
	# For fast calculation of inv_jacobian (approximately)
	Us = torch.zeros(bsz, total_hsize, seq_len, threshold).to(dev)     # One can also use an L-BFGS scheme to further reduce memory
	VTs = torch.zeros(bsz, threshold, total_hsize, seq_len).to(dev)
	update = -matvec(Us[:,:,:,:nstep], VTs[:,:nstep], gx)      # Formally should be -torch.matmul(inv_jacobian (-I), gx)
	prot_break = False
	
	# To be used in protective breaks
	protect_thres = (1e6 if stop_mode == "abs" else 1e3) * seq_len
	new_objective = 1e8

	trace_dict = {'abs': [],
				  'rel': []}
	lowest_dict = {'abs': 1e8,
				   'rel': 1e8}
	lowest_step_dict = {'abs': 0,
						'rel': 0}
	nstep, lowest_xest, lowest_gx = 0, x_est, gx
	
	indexing_list = []

	while nstep < threshold:
		x_est, gx, delta_x, delta_gx, ite = line_search(update, x_est, gx, g, nstep=nstep, on=ls)
		nstep += 1
		tnstep += (ite+1)
		abs_diff = torch.norm(gx).item()
		rel_diff = abs_diff / (torch.norm(gx + x_est).item() + 1e-9)
		diff_dict = {'abs': abs_diff,
					 'rel': rel_diff}
		trace_dict['abs'].append(abs_diff)
		trace_dict['rel'].append(rel_diff)
		for mode in ['rel', 'abs']:
			if diff_dict[mode] < lowest_dict[mode]:
				if mode == stop_mode: 
					lowest_xest, lowest_gx = x_est.clone().detach(), gx.clone().detach()
				lowest_dict[mode] = diff_dict[mode]
				lowest_step_dict[mode] = nstep
		
		if indexing and (nstep+1) in indexing:
			indexing_list.append(lowest_xest)

		new_objective = diff_dict[stop_mode]
		if new_objective < eps: break
		if new_objective < 3*eps and nstep > 30 and np.max(trace_dict[stop_mode][-30:]) / np.min(trace_dict[stop_mode][-30:]) < 1.3:
			# if there's hardly been any progress in the last 30 steps
			break
		if new_objective > trace_dict[stop_mode][0] * protect_thres:
			prot_break = True
			break

		part_Us, part_VTs = Us[:,:,:,:nstep-1], VTs[:,:nstep-1]
		vT = rmatvec(part_Us, part_VTs, delta_x)
		u = (delta_x - matvec(part_Us, part_VTs, delta_gx)) / torch.einsum('bij, bij -> b', vT, delta_gx)[:,None,None]
		vT[vT != vT] = 0
		u[u != u] = 0
		VTs[:,nstep-1] = vT
		Us[:,:,:,nstep-1] = u
		update = -matvec(Us[:,:,:,:nstep], VTs[:,:nstep], gx)
	
	# Fill everything up to the threshold length
	for _ in range(threshold+1-len(trace_dict[stop_mode])):
		trace_dict[stop_mode].append(lowest_dict[stop_mode])
		trace_dict[alternative_mode].append(lowest_dict[alternative_mode])
	
	return {"result": lowest_xest,
			"indexing": indexing_list,
			"lowest": lowest_dict[stop_mode],
			"nstep": lowest_step_dict[stop_mode],
			"prot_break": prot_break,
			"abs_trace": trace_dict['abs'],
			"rel_trace": trace_dict['rel'],
			"eps": eps,
			"threshold": threshold}


def anderson(f, x0, 
		threshold=50, eps=1e-3, stop_mode='rel', indexing=None,
		m=6, lam=1e-4, beta=1.0, intercept=-1, 
		**kwargs):
	""" Anderson acceleration for fixed point iteration. """
	bsz, d, L = x0.shape
	alternative_mode = 'rel' if stop_mode == 'abs' else 'abs'
	X = torch.zeros(bsz, m, d*L, dtype=x0.dtype, device=x0.device)
	F = torch.zeros(bsz, m, d*L, dtype=x0.dtype, device=x0.device)
	X[:,0], F[:,0] = x0.reshape(bsz, -1), f(x0).reshape(bsz, -1)
	X[:,1], F[:,1] = F[:,0], f(F[:,0].reshape_as(x0)).reshape(bsz, -1)
	
	H = torch.zeros(bsz, m+1, m+1, dtype=x0.dtype, device=x0.device)
	H[:,0,1:] = H[:,1:,0] = 1
	y = torch.zeros(bsz, m+1, 1, dtype=x0.dtype, device=x0.device)
	y[:,0] = 1

	intercept_result = None
	trace_dict = {'abs': [],
				  'rel': []}
	lowest_dict = {'abs': 1e8,
				   'rel': 1e8}
	lowest_step_dict = {'abs': 0,
						'rel': 0}
	
	indexing_list = []

	for k in range(2, threshold):
		n = min(k, m)
		G = F[:,:n]-X[:,:n]
		H[:,1:n+1,1:n+1] = torch.bmm(G,G.transpose(1,2)) + lam*torch.eye(n, dtype=x0.dtype,device=x0.device)[None]
		alpha = torch.solve(y[:,:n+1], H[:,:n+1,:n+1])[0][:, 1:n+1, 0]   # (bsz x n)
		
		X[:,k%m] = beta * (alpha[:,None] @ F[:,:n])[:,0] + (1-beta)*(alpha[:,None] @ X[:,:n])[:,0]
		F[:,k%m] = f(X[:,k%m].reshape_as(x0)).reshape(bsz, -1)
		gx = (F[:,k%m] - X[:,k%m]).view_as(x0)
		abs_diff = gx.view(bsz, -1).norm(dim=1, keepdim=True)
		rel_diff = (abs_diff / (1e-5 + F[:,k%m].view(bsz, -1).norm(dim=1, keepdim=True))).mean().item()
		abs_diff = abs_diff.mean().item()
		diff_dict = {'abs': abs_diff,
					 'rel': rel_diff}
		trace_dict['abs'].append(abs_diff)
		trace_dict['rel'].append(rel_diff)
		
		for mode in ['rel', 'abs']:
			if diff_dict[mode] < lowest_dict[mode]:
				if mode == stop_mode: 
					lowest_xest, lowest_gx =  X[:,k%m].view_as(x0).clone().detach(), gx.clone().detach()
				lowest_dict[mode] = diff_dict[mode]
				lowest_step_dict[mode] = k
		
		if indexing and (k+1) in indexing:
			indexing_list.append(lowest_xest)

		if k == intercept-1:
			intercept_result = X[:,k%m].view_as(x0).clone().detach()
		if trace_dict[stop_mode][-1] < eps:
			for _ in range(threshold-1-k):
				trace_dict[stop_mode].append(lowest_dict[stop_mode])
				trace_dict[alternative_mode].append(lowest_dict[alternative_mode])
			break

	out = {"result": lowest_xest,
		   "indexing": indexing_list,
		   "lowest": lowest_dict[stop_mode],
		   "nstep": lowest_step_dict[stop_mode],
		   "prot_break": False,
		   "abs_trace": trace_dict['abs'],
		   "rel_trace": trace_dict['rel'],
		   "eps": eps,
		   "intercept_result": intercept_result,
		   "threshold": threshold}
	X = F = None
	return out


def analyze_broyden(res_info, err=None, judge=True, name='forward', training=True, save_err=True):
	"""
	For debugging use only :-)
	"""
	res_est = res_info['result']
	nstep = res_info['nstep']
	diff = res_info['diff']
	diff_detail = res_info['diff_detail']
	prot_break = res_info['prot_break']
	trace = res_info['trace']
	eps = res_info['eps']
	threshold = res_info['threshold']
	if judge:
		return nstep >= threshold or (nstep == 0 and (diff != diff or diff > eps)) or prot_break or torch.isnan(res_est).any()
	
	assert (err is not None), "Must provide err information when not in judgment mode"
	prefix, color = ('', 'red') if name == 'forward' else ('back_', 'blue')
	eval_prefix = '' if training else 'eval_'
	
	# Case 1: A nan entry is produced in Broyden
	if torch.isnan(res_est).any():
		msg = colored(f"WARNING: nan found in Broyden's {name} result. Diff: {diff}", color)
		print(msg)
		if save_err: pickle.dump(err, open(f'{prefix}{eval_prefix}nan.pkl', 'wb'))
		return (1, msg, res_info)
		
	# Case 2: Unknown problem with Broyden's method (probably due to nan update(s) to the weights)
	if nstep == 0 and (diff != diff or diff > eps):
		msg = colored(f"WARNING: Bad Broyden's method {name}. Why?? Diff: {diff}. STOP.", color)
		print(msg)
		if save_err: pickle.dump(err, open(f'{prefix}{eval_prefix}badbroyden.pkl', 'wb'))
		return (2, msg, res_info)
		
	# Case 3: Protective break during Broyden (so that it does not diverge to infinity)
	if prot_break and np.random.uniform(0,1) < 0.05:
		msg = colored(f"WARNING: Hit Protective Break in {name}. Diff: {diff}. Total Iter: {len(trace)}", color)
		print(msg)
		if save_err: pickle.dump(err, open(f'{prefix}{eval_prefix}prot_break.pkl', 'wb'))
		return (3, msg, res_info)
		
	return (-1, '', res_info)
