# Supplementary material
Source: ML conference proceedings conference paper supplement (https://proceedings.neurips.cc/paper_files/paper/2022/hash/361e5112d2eca09513bbd266e4b2d2be-Abstract.html)
Supplement: Supplementary file 1 [file 361e5112d2eca09513bbd266e4b2d2be-Supplemental-Conference.zip › supplementary/code/masked_autoencoding/test.py]

"""
Main program
"""
import os
from pathlib import Path
import random
import logging
import time

import dill

import numpy as np
from sklearn.decomposition import PCA

from einops import rearrange

from torchvision.utils import make_grid

import submitit

import cloudpickle
import src
# otherwise pickle.load from submitit launcher won't find src since cloudpickle registers by reference by default
cloudpickle.register_pickle_by_value(src)

from masked_autoencoding.src.utils import py2pil
from masked_autoencoding.src.datasets import get_inf_dataset
from masked_autoencoding.src.model_and_trainer import ModelAndTrainer

from omegaconf import DictConfig, OmegaConf, open_dict
import hydra

LOGGER = logging.getLogger(__name__)


@hydra.main(config_path='conf', config_name='test_config')
def test(cfg: DictConfig) -> float:
	try:
		env = submitit.JobEnvironment()
		LOGGER.info('Process ID %s executing test experiment %s, with %s.', os.getpid(), cfg.experiment.name, env)
	except RuntimeError:
		LOGGER.info('Process ID %s executing test experiment %s', os.getpid(), cfg.experiment.name)

	save = Path(os.getcwd())

	# For saving images produced during test
	imgs_save_folder = save / 'imgs'
	imgs_save_folder.mkdir(exist_ok=True)

	# Retrieving the path to the pretrained model checkpoint
	pretrained_model_path = cfg.experiment.pretrained_model_path.get(str(cfg.dataset.name).lower(), None)

	LOGGER.info('Current working/save directory: %s', save)

	# Merging base config with pretrained config, overwriting cfg params with
	# pretrained_cfg params when there are matches (overwrite priority goes right-to-left)
	if cfg.use_pretrained_cfg:
		LOGGER.info('Merging config used to train pretrained model...')

		# Loading pretrained config
		pretrained_cfg = Path(pretrained_model_path).parent / '.hydra/config.yaml'
		pretrained_cfg = OmegaConf.load(str(pretrained_cfg))

		# Pretrained configs to use
		masking_val_cfg = OmegaConf.select(pretrained_cfg, 'experiment.masking.val')
		loss_cfg = OmegaConf.select(pretrained_cfg, 'experiment.trainer.loss')
		model_cfg = OmegaConf.select(pretrained_cfg, 'model')
		dataset_cfg = OmegaConf.select(pretrained_cfg, 'dataset')
		input_size_cfg = OmegaConf.select(pretrained_cfg, 'experiment.input_size.train')

		# Remove deprecated keys
		loss_cfg.pop('jac_factor', None)
		model_cfg.pop('head_dim', None)

		# Remove old targets
		loss_cfg.pop('_target_', None)
		model_cfg.pop('_target_', None)

		# Merge/replace with pretrained config
		with open_dict(cfg):
			OmegaConf.update(cfg, 'experiment.masking.val', masking_val_cfg, merge=False)
			if cfg.use_pretrained_size:
				OmegaConf.update(cfg, 'experiment.input_size.test', input_size_cfg, merge=False)
		OmegaConf.update(cfg, 'experiment.trainer.loss', loss_cfg)
		OmegaConf.update(cfg, 'model', model_cfg)
		OmegaConf.update(cfg, 'dataset', dataset_cfg, merge=False)

		# Overwrite old config with merged one
		cfg_path = save / '.hydra' / 'config.yaml'
		LOGGER.info(f'Overwriting old config with merged config at {cfg_path}...')
		OmegaConf.save(cfg, cfg_path, resolve=True)

	# Lazy importing for pickling purposes with submitit and cloudpickle so that cuda.deterministic=True and 
	# cudnn.benchmark=False don't break the pickling process (they change the torch backend, so importing
	# them outside would mean pickle wouldn't pickle the modified torch)
	import torch
	from torch.utils.data import DataLoader
	import torch.backends.cudnn as cudnn

	# Setting deterministic behaviour for RNG for results reproducibility purposes
	torch.manual_seed(cfg.experiment.random_seed)
	torch.cuda.manual_seed(cfg.experiment.random_seed)
	if cfg.experiment.deterministic:
		cudnn.deterministic = True
		cudnn.benchmark = False
	else:
		cudnn.deterministic = False
		cudnn.benchmark = True
		LOGGER.warn('Using non-deterministic cudnn backend')
	np.random.seed(cfg.experiment.random_seed)
	random.seed(cfg.experiment.random_seed)

	# Displaying device info
	if torch.cuda.is_available and 'cuda' in cfg.experiment.device:
		device = torch.device(cfg.experiment.device)
		devices = list(range(torch.cuda.device_count()))
		devices_properties = [torch.cuda.get_device_properties(torch.device(f'cuda:{d}')) for d in devices]
		LOGGER.info('CUDA available.')
		for i in range(len(devices)):
			LOGGER.info('Using GPU/device %s: %s', i, devices_properties[i])
		mode = 'gpu'
	else:
		device = torch.device('cpu')
		LOGGER.info('CUDA not available. Using CPU mode.')
		mode = 'cpu'

	# Setup model
	LOGGER.info('Setting up model...')
	model_and_trainer = ModelAndTrainer(cfg, device, phase='test')
	model = model_and_trainer.model
	loss = model_and_trainer.loss

	# Instantiate LPIPS manually
	loss.inst_lpips(device)

	# Load user-defined checkpoint for pre-trained model
	if not model_and_trainer.load_pretrained_model(cfg, ckpt_path=pretrained_model_path):
		raise RuntimeError('Pretrained model checkpoint must be provided.')

	# Log model and number of params
	LOGGER.info('Using model: %s', model)
	num_train_params = sum(param.numel() for param in model.parameters() if param.requires_grad)
	num_nontrain_params = sum(param.numel() for param in model.parameters() if not param.requires_grad)
	LOGGER.info('Trainable params: %s', num_train_params)
	LOGGER.info('Untrainable params: %s', num_nontrain_params)
	LOGGER.info('Total number of params: %s', num_train_params + num_nontrain_params)

	# Setup dataset and dataloader
	input_size = list(cfg.experiment.input_size.test)
	batch_size = cfg.experiment.batch_size.test
	attn_size = getattr(model, 'localized_attn_neighbourhood', list(cfg.experiment.attn_size.test))
	LOGGER.info(
		'Testing on dataset: %s, batch size: %s, image size: %s, attn size: %s',
		cfg.dataset.name, batch_size, input_size, attn_size
	)
	dataset = get_inf_dataset(cfg.dataset.name, cfg.dataset.dataset_root, input_size)
	gpuargs = {'num_workers': cfg.experiment.num_workers,
			   'pin_memory': True,
			   'drop_last' : True} if mode == 'gpu' else {}  # NOTE: drop_last should be False to use all test data
	loader = DataLoader(dataset, batch_size=batch_size, shuffle=False, **gpuargs)

	# Initialize final results dictionary
	final_results = {
		'losses': {
			'l1': 0.,
			'psnr': 0.,
			'ssim': 0.,
			'lpips': 0.,
			'overflow': 0.,
		},
		'times': {
			'f-time': 0.,
		},
		'scale_factors': {
			'l1': loss.rec_factor,
			'overflow': loss.overflow_factor,
		},
	}

	latents = {
		'data': [],
		'data_avg': [],
		'labels': []
	}

	# PCA for visualizing cell hidden channels in XYZ
	pca = PCA(n_components=cfg.pca_components, random_state=int(cfg.experiment.random_seed), svd_solver='arpack')

	# Test loop
	model_and_trainer.eval()
	num_batches = len(loader)
	i = 1
	for i, (x, y) in enumerate(loader, start=1):
		x = x.to(device)
		y = y.to(device)

		with torch.no_grad():
			# Forward pass
			forward_start = time.perf_counter()
			results = model_and_trainer(cfg, i, x, y, phase='test')
			forward_time = time.perf_counter() - forward_start

			# Compute losses
			losses = loss(cfg, model, results, phase='test')

			# Accumulate them
			final_results['losses']['l1'] += losses['rec_loss']
			final_results['losses']['psnr'] += losses['psnr']
			final_results['losses']['ssim'] += losses['ssim']
			final_results['losses']['lpips'] += losses['lpips']
			final_results['losses']['overflow'] += losses['overflow_loss']
			final_results['times']['f-time'] += forward_time

			# Save images
			if i % cfg.experiment.save_frequency == 0:
				masked_in = results.pop('masked_input', None)
				out = results.pop('output_img', None)
				gt = results.pop('ground_truth', None)['x']

				if all(images is not None for images in [masked_in, out, gt]):
					# log input images, output images and ground truth
					imgs = torch.cat([masked_in, out, gt], 0)
					imgs = make_grid(imgs, nrow=x.shape[0], pad_value=1)
					try:
						img_path = str(imgs_save_folder / f'{i:04}.png')
						LOGGER.debug(f'Writing image to disk: {img_path}')
						py2pil(imgs).save(img_path)
					except OSError:
						LOGGER.exception('Can not save images.')

			# Accumulate cell hidden representation
			if cfg.save_pca_data and 'CA' in cfg.model._target_:
				if cfg.dataset.name in ['MNIST', 'FashionMNIST', 'CIFAR10']:
					hidden = model.get_hidden(results['output_cells'])
					hidden_avg = torch.mean(hidden, dim=(-2, -1))
					hidden = rearrange(hidden, 'b hidden h w -> b (h w hidden)')
					latents['data'].append(hidden.cpu().numpy())
					latents['data_avg'].append(hidden_avg.cpu().numpy())
					latents['labels'].append(y.cpu().numpy())

		if i % cfg.experiment.log_frequency == 0:
			# Logging val results to logger
			LOGGER.info(
				f'Test results at val iter {i:04}/{num_batches:04}: '
				f'L1 loss: {losses["rec_loss"]:.10f}, scale factor: {loss.rec_factor}, '
				f'PSNR: {losses["psnr"]:.10f}, '
				f'SSIM: {losses["ssim"]:.10f}, '
				f'LPIPS: {losses["lpips"]:.10f}, '
				f'overflow loss: {losses["overflow_loss"]:.10f}, scale factor: {loss.overflow_factor}, '
				f'f-time: {forward_time}s'
			)

	# Average metrics over test set
	for result_type in final_results:
		if result_type == 'scale_factors' or result_type == 'other':
			continue
		for metric in final_results[result_type]:
			final_results[result_type][metric] /= float(i)
			if torch.is_tensor(final_results[result_type][metric]):
				final_results[result_type][metric] = final_results[result_type][metric].item()

	# Gather average results
	l1_loss = final_results['losses']['l1']
	l1_scale_factor = final_results['scale_factors']['l1']
	psnr = final_results['losses']['psnr']
	ssim = final_results['losses']['ssim']
	lpips = final_results['losses']['lpips']
	overflow_loss = final_results['losses']['overflow']
	overflow_scale_factor = final_results['scale_factors']['overflow']
	f_time = final_results['times']['f-time']

	# Log averaged results
	LOGGER.info(
		f'Avg L1 loss: {l1_loss}, scale factor: {l1_scale_factor}, '
		f'avg PSNR: {psnr}, '
		f'avg SSIM: {ssim}, '
		f'avg LPIPS: {lpips}, '
		f'avg overflow loss: {overflow_loss}, scale factor: {overflow_scale_factor}, '
		f'avg f-time: {f_time}s'
	)

	# Serialize averaged results along with config
	results_to_serialize = OmegaConf.masked_copy(OmegaConf.create(final_results), ['losses', 'times'])
	results_to_serialize = OmegaConf.merge(results_to_serialize, cfg)
	with open_dict(results_to_serialize):
		results_to_serialize.output_imgs_path = str(imgs_save_folder)
	res_path = save / 'results.yaml'
	LOGGER.info(f'Saving results to {res_path}.')
	OmegaConf.save(results_to_serialize, res_path, resolve=True)

	# Save pca results
	if cfg.dataset.name in ['MNIST', 'FashionMNIST', 'CIFAR10'] and len(latents['data']) > 0 and cfg.save_pca_data:
		# Retrieve data and labels
		data = np.concatenate(latents['data'])  # N (h w hidden)
		data_avg = np.concatenate(latents['data_avg'])  # N (h w 1)
		labels = np.concatenate(latents['labels'])  # N

		# Zero-centre data and PCA dim reduce
		mean = np.mean(data, 0)
		data = data - mean
		data = pca.fit_transform(data)  # N n-components
		mean_avg = np.mean(data_avg, 0)
		data_avg = data_avg - mean_avg
		data_avg = pca.fit_transform(data_avg)  # N n-components

		# Saving pca data
		torch.save(
			{
				'data': data,
				'data_avg': data_avg,
				'labels': labels
			},
			str(save / 'pca.pth.tar'),
			pickle_module=dill
		)
	elif cfg.dataset.name not in ['MNIST', 'FashionMNIST', 'CIFAR10'] and cfg.save_pca_data:
		LOGGER.warn(
			'Can only plot pca results when MNIST, FashionMNIST, or CIFAR10 dataset is chosen. '
			'Skipping plotting.'
		)

	return final_results['losses']['psnr']


if __name__ == '__main__':
	test()
