# Supplementary material
Source: ML conference proceedings conference paper supplement (https://proceedings.neurips.cc/paper_files/paper/2022/hash/361e5112d2eca09513bbd266e4b2d2be-Abstract.html)
Supplement: Supplementary file 1 [file 361e5112d2eca09513bbd266e4b2d2be-Supplemental-Conference.zip › supplementary/code/masked_autoencoding/train.py]

"""
Imports and utility functions
"""
import os
import random
import shutil
import logging
import time
from pathlib import Path

import numpy as np
import wandb

from omegaconf import DictConfig, OmegaConf
import hydra
from hydra.types import TaskFunction
import submitit

import cloudpickle
import src
# Otherwise pickle.load from submitit launcher won't find src since cloudpickle registers by reference by default
cloudpickle.register_pickle_by_value(src)

from masked_autoencoding.src.utils import norm_grad
from masked_autoencoding.src.datasets import get_train_val_datasets
from masked_autoencoding.src.model_and_trainer import ModelAndTrainer

LOGGER = logging.getLogger(__name__)


class Train(TaskFunction):
	def __init__(self):
		self.model_and_trainer = None
		self.run = None
		self.cfg = None
		self.src = src
		self.ready_to_checkpoint = True
		self.train_iter = 0
		self.save = None

	# Main train loop code
	def __call__(self, cfg: DictConfig) -> float:
		self.cfg = cfg
		run = self.run = wandb.run
		within_wandb_context = False

		try:
			env = submitit.JobEnvironment()
			LOGGER.info('Process ID %s executing experiment %s, with %s.', os.getpid(), cfg.experiment.name, env)
		except RuntimeError:
			LOGGER.info('Process ID %s executing experiment %s', os.getpid(), cfg.experiment.name)

		save = self.save = Path(os.getcwd())

		LOGGER.info('Current working/save directory: %s', save)

		# W&B setup
		runtime_cfg = hydra.core.hydra_config.HydraConfig.get()
		if run is None:
			LOGGER.info('Initializing wandb...')
			if 'BasicSweeper' in runtime_cfg.sweeper._target_:
				experiment_group = save.name
				wandb_run_id = experiment_group
			else:
				experiment_group = save.parent.stem
				wandb_run_id = experiment_group + '-' + save.name
			if cfg.wandb.run_id is not None:
				wandb_run_id = cfg.wandb.run_id
			run = self.run = wandb.init(entity=cfg.wandb.entity, project=cfg.wandb.project,
										settings=wandb.Settings(start_method='thread'),
										config=OmegaConf.to_container(cfg, resolve=True, throw_on_missing=True),
										group=experiment_group, name=save.name,
										notes=OmegaConf.to_yaml(runtime_cfg.overrides.task),
										resume='allow',
										id=wandb_run_id,
										tags=[cfg.experiment.name, cfg.model._target_, cfg.dataset.name])
		else:
			within_wandb_context = True
		# Defining custom x axis metrics
		run.define_metric('train/step')
		run.define_metric('validation/step')
		# Defining metrics to plot against the above x axes
		run.define_metric('train/*', step_metric='train/step')
		run.define_metric('validation/*', step_metric='train/step')
		run.define_metric('validation/reconstruction_loss', step_metric='train/step', summary='best')
		run.define_metric('validation/examples', step_metric='validation/step')
		LOGGER.info('Logged wandb metrics available at url: %s', run.get_url())

		run.summary['workdir'] = str(save)

		# Lazy importing for pickling purposes with submitit and cloudpickle so that cuda.deterministic=True and 
		# cudnn.benchmark=False don't break the pickling process (they change the torch backend, so importing
		# them outside would mean pickle wouldn't pickle the modified torch)
		import torch
		from torch.utils.data import DataLoader
		import torch.backends.cudnn as cudnn

		# Setting deterministic behaviour for RNG for results reproducibility purposes
		torch.manual_seed(cfg.experiment.random_seed)
		torch.cuda.manual_seed(cfg.experiment.random_seed)
		cudnn.deterministic = True
		cudnn.benchmark = False
		np.random.seed(cfg.experiment.random_seed)
		random.seed(cfg.experiment.random_seed)

		# Displaying device info
		if torch.cuda.is_available and 'cuda' in cfg.experiment.device:
			device = torch.device(cfg.experiment.device)
			devices = list(range(torch.cuda.device_count()))
			devices_properties = [torch.cuda.get_device_properties(torch.device(f'cuda:{d}')) for d in devices]
			LOGGER.info('CUDA available.')
			for i in range(len(devices)):
				LOGGER.info('Using GPU/device %s: %s', i, devices_properties[i])
			mode = 'gpu'
		else:
			device = torch.device('cpu')
			LOGGER.info('CUDA not available. Using CPU mode.')
			mode = 'cpu'

		# Setup model, loss, opt, and train & val loss arrays
		LOGGER.info('Setting up model and loss...')
		model_and_trainer = self.model_and_trainer = ModelAndTrainer(cfg, device)
		model = model_and_trainer.model
		opt = model_and_trainer.opt
		loss = model_and_trainer.loss
		lr_sched = model_and_trainer.lr_sched

		# Log gradients and model params on wandb
		run.watch(model, log_freq=cfg.experiment.log_frequency*10)

		# Load latest checkpoint in save dir (cwd) if requested, otherwise randomly initialize
		model_and_trainer.load_latest_checkpoint(cfg, save)

		# Log model and number of params
		LOGGER.info('Using model: %s', model)  # NOTE: logging multi-line logs is a no-no
		num_train_params = sum(param.numel() for param in model.parameters() if param.requires_grad)
		num_nontrain_params = sum(param.numel() for param in model.parameters() if not param.requires_grad)
		LOGGER.info('Trainable params: %s', num_train_params)
		LOGGER.info('Untrainable params: %s', num_nontrain_params)
		LOGGER.info('Total number of params: %s', num_train_params + num_nontrain_params)
		run.summary['trainable_params'] = num_train_params
		run.summary['untrainable_params'] = num_nontrain_params
		run.summary['total_params'] = num_train_params + num_nontrain_params

		# Setup dataset and dataloader
		train_size = list(cfg.experiment.input_size.train)
		train_batch_size = cfg.experiment.batch_size.train
		validation_size = list(cfg.experiment.input_size.val)
		val_batch_size = cfg.experiment.batch_size.val
		LOGGER.info(
			'Training on dataset: %s, train batch size: %s, train image size: %s, '
			'val batch size: %s, val image size: %s',
			cfg.dataset.name, train_batch_size, train_size, val_batch_size, validation_size
		)
		train_dataset, validation_dataset = get_train_val_datasets(cfg.dataset.name, cfg.dataset.dataset_root,
																   train_size, validation_size)
		gpuargs = {'num_workers': cfg.experiment.num_workers,
				   'pin_memory': True,
				   'drop_last' : True} if mode == 'gpu' else {}  # NOTE: drop_last should be false for val
		sampler = torch.utils.data.RandomSampler(train_dataset, replacement=True,
												 num_samples=(cfg.experiment.iter.train.total+1
															  - cfg.experiment.iter.train.start)*train_batch_size)
		train_loader = DataLoader(train_dataset, batch_size=train_batch_size, sampler=sampler, **gpuargs)
		validation_loader = DataLoader(validation_dataset, batch_size=val_batch_size, shuffle=False, **gpuargs)

		# Training loop
		LOGGER.info('Starting training at iter %s. Training for %s iterations.',
					cfg.experiment.iter.train.start, len(train_loader))
		best_model_at_train_iter = 1
		model_and_trainer.train()
		for i, (x, y) in enumerate(train_loader, start=cfg.experiment.iter.train.start):
			self.ready_to_checkpoint = False
			x = x.to(model.device)
			y = y.to(model.device)

			# Forward pass
			forward_start = time.perf_counter()
			results = model_and_trainer(cfg, i, x, y)
			forward_time = time.perf_counter() - forward_start

			# Compute losses
			losses = loss(cfg, model, results, phase='train')
			total_loss = losses['rec_loss'] + losses['overflow_loss']

			# Backward pass and logging
			with torch.no_grad():
				opt.zero_grad()

				backward_start = time.perf_counter()
				total_loss.backward()
				backward_time = time.perf_counter() - backward_start

				# Normalize gradients
				# TODO: don't normalize gradients for non-CA models
				if cfg.experiment.normalize_gradients:
					norm_grad(model)

				opt.step()
				lr_sched.step()

				# Add new states to nca pool, shuffle, and retain first {pool_size} states
				if 'CA' in cfg.model._target_:
					model_and_trainer.update_pools(
						cfg,
						results['ground_truth']['x'],
						results['ground_truth']['y'],
						results['output_cells'].detach(),
						results['was_sampled']
					)

				# Track losses and scaling factors
				train_scalars = {
					'reconstruction_loss': losses['rec_loss'].item(),
					'reconstruction_factor': loss.rec_factor,
					'overflow_loss': losses['overflow_loss'].item(),
					'overflow_factor': loss.overflow_factor,
					'total_loss': total_loss.item()
				}
				model_and_trainer.update_tracked_scalars(train_scalars, i, phase='train')

				# Logging to wandb and logger
				if i % cfg.experiment.log_frequency == 0:
					train_results = {
						'masked_input': results['masked_input'],
						'output_img': results['output_img'],
						'ground_truth' : results['ground_truth']['x'],
						'learning_rate': opt.param_groups[0]['lr'],
						'pool_size': len(model_and_trainer.z_pool) if hasattr(model_and_trainer, 'z_pool') else 0,
						'forward_time': forward_time,
						'backward_time': backward_time,
						**train_scalars
					}
					model_and_trainer.log_to_wandb(run, i, train_results, prefix='train')

					# Logging train results to logger
					LOGGER.info(
						'Training results at train iter %s/%s: '
						'total loss: %f, reconstruction loss: %f, overflow loss: %f, lr: %f, pool size: %d, '
						'f-time: %fs, b-time: %fs',
						i,
						cfg.experiment.iter.train.total,
						train_results['total_loss'],
						train_results['reconstruction_loss'],
						train_results['overflow_loss'],
						train_results['learning_rate'],
						len(model_and_trainer.z_pool) if hasattr(model_and_trainer, 'z_pool') else 0,
						forward_time,
						backward_time
					)

			# For pre-emption purposes
			self.ready_to_checkpoint = True
			self.train_iter = i

			if i % cfg.experiment.val_frequency == 0:
				avg_val_loss = self.validate(torch, cfg, run, model_and_trainer, i, validation_loader)

				# Track avg validation losses and scaling factors
				val_scalars = {
					'reconstruction_loss': avg_val_loss['rec'].item(),
					'reconstruction_factor': loss.rec_factor,
					'overflow_loss': avg_val_loss['overflow'].item(),
					'overflow_factor': loss.overflow_factor,
					'total_loss': avg_val_loss['total'].item(),
					'psnr': avg_val_loss['psnr'].item()
				}
				model_and_trainer.update_tracked_scalars(val_scalars, i, phase='validation')

				# Log scalars to wandb. Other results such as images are logged to wandb within self.validate(...)
				model_and_trainer.log_to_wandb(run, i, val_scalars, prefix='validation',
				                               step_prefix='train', scalars_only=True)

				# Logging validation results to logger
				LOGGER.info(
					'Validation avg results at train iter %s: '
					'avg reconstruction loss: %.3f, avg overflow loss: %.3f, avg total loss: %.3f, avg psnr: %.3f',
					i,
					val_scalars['reconstruction_loss'],
					val_scalars['overflow_loss'],
					val_scalars['total_loss'],
					val_scalars['psnr']
				)

				# Keeping track of training iteration with lowest validation reconstruction error
				if val_scalars['reconstruction_loss'] < model_and_trainer.best_avg_val_rec_err:
					model_and_trainer.best_avg_val_rec_err = val_scalars['reconstruction_loss']
					best_model_at_train_iter = i
					run.summary['best_avg_val_rec_err'] = model_and_trainer.best_avg_val_rec_err
					run.summary['best_model_at_train_iter'] = i

					# Saving then copying model to nca_best.pth.tar
					self.model_and_trainer.save_checkpoint(cfg, best_model_at_train_iter, save)
					chk_fname = save / f'nca_{best_model_at_train_iter}.pth.tar'
					best_chk_fname = save /'nca_best.pth.tar'
					run.summary['best_model_filepath'] = str(best_chk_fname)
					LOGGER.info('Best model (train iter %s). Copying to %s.', best_model_at_train_iter, best_chk_fname)
					try:
						shutil.copyfile(chk_fname, best_chk_fname)
					except FileNotFoundError:
						LOGGER.exception('Best model file not found. Skipping save.')

			if i % cfg.experiment.save_frequency == 0:
				self.model_and_trainer.save_checkpoint(cfg, i, save)

		run.alert(
			title='Job Finished',
			text=f'Job {run.name} in group {run.group} finished with best validation error '
				 f'{model_and_trainer.best_avg_val_rec_err:.4f} at train iteration {best_model_at_train_iter}'
				 f'\nOverrides:\n{OmegaConf.to_yaml(runtime_cfg.overrides.task)}\nWorking directory: {save}',
			level=wandb.AlertLevel.INFO
		)

		if not within_wandb_context:
			run.finish()

		return model_and_trainer.best_avg_val_rec_err

	def validate(self, torch, cfg, run, model_and_trainer, train_step, validation_loader):
		model = model_and_trainer.model
		loss = model_and_trainer.loss
		model_and_trainer.eval()
		LOGGER.info('Validating at iter %s.', train_step)
		with torch.no_grad():
			avg_val_loss = {'rec': 0, 'overflow': 0, 'total': 0, 'psnr': 0}
			num_batches = len(validation_loader)
			j = 1  # or else /= float(j) below will complain
			for j, (x, y) in enumerate(validation_loader, start=1):
				x = x.to(model.device)
				y = y.to(model.device)

				# Forward pass
				forward_start = time.perf_counter()
				results = model_and_trainer(cfg, j, x, y, phase='validation')
				forward_time = time.perf_counter() - forward_start

				# Compute losses
				losses = loss(cfg, model, results, phase='validation')
				total_loss = losses['rec_loss'] + losses['overflow_loss']

				# Accumulate them
				avg_val_loss['rec'] += losses['rec_loss']
				avg_val_loss['overflow'] += losses['overflow_loss']
				avg_val_loss['total'] += total_loss
				avg_val_loss['psnr'] += losses['psnr']

				if j % cfg.experiment.log_frequency == 0:
					# Log output images, masked inputs, and ground truths
					val_img_results = {
						'masked_input': results['masked_input'],
						'output_img': results['output_img'],
						'ground_truth' : results['ground_truth']['x'],
					}
					model_and_trainer.log_to_wandb(run, ((train_step-1)*num_batches) + j, val_img_results,
					                               prefix='validation', step_prefix='validation', images_only=True)

					# Logging val results to logger
					LOGGER.info(
						'Validation results at val iter %s/%s: '
						'psnr: %f, total loss: %f, reconstruction loss: %f, overflow loss: %f, f-time: %fs',
						j,
						len(validation_loader),
						losses['psnr'],
						total_loss,
						losses['rec_loss'],
						losses['overflow_loss'],
						forward_time
					)

			# Average losses over validation set
			avg_val_loss['rec'] /= float(j)
			avg_val_loss['overflow'] /= float(j)
			avg_val_loss['total'] /= float(j)
			avg_val_loss['psnr'] /= float(j)
		model_and_trainer.train()
		return avg_val_loss


"""
Main program
"""
if __name__ == '__main__':
	train = Train()
	app = hydra.main(config_path='conf', config_name='train_config')(train.__call__)
	app()
