# Supplementary material
Source: ML conference proceedings conference paper supplement (https://proceedings.neurips.cc/paper_files/paper/2022/hash/361e5112d2eca09513bbd266e4b2d2be-Abstract.html)

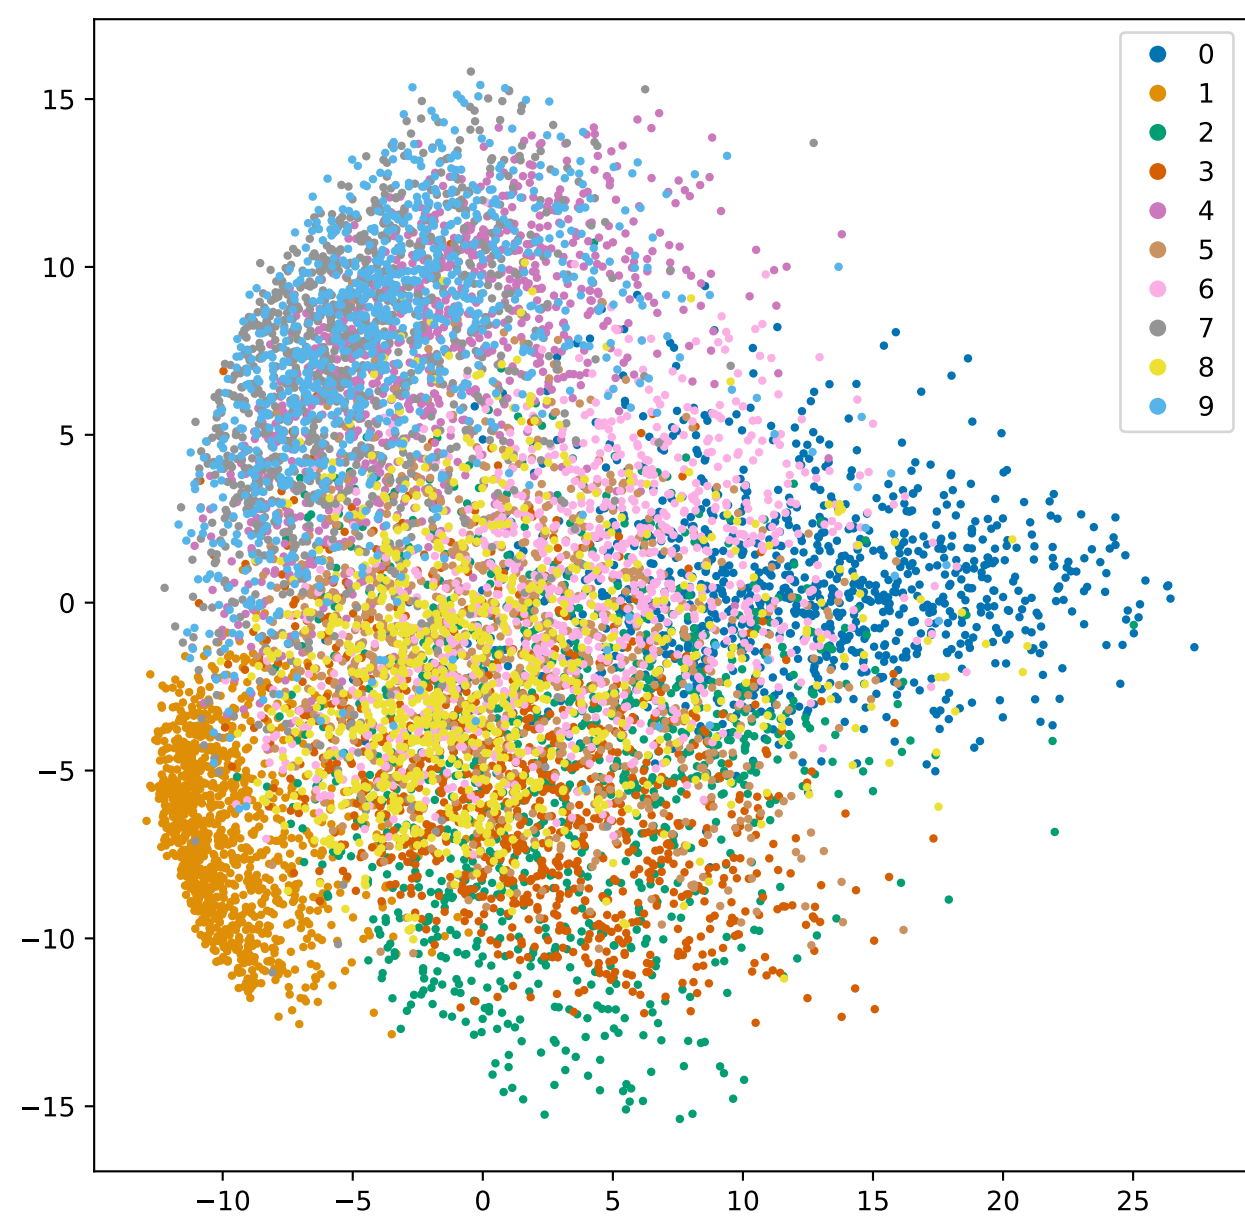

Supplement: Supplementary file 1 [file 361e5112d2eca09513bbd266e4b2d2be-Supplemental-Conference.zip › supplementary/results/CA results/hidden state viz/vitca/mnist/pca_mnist_2D.pdf]

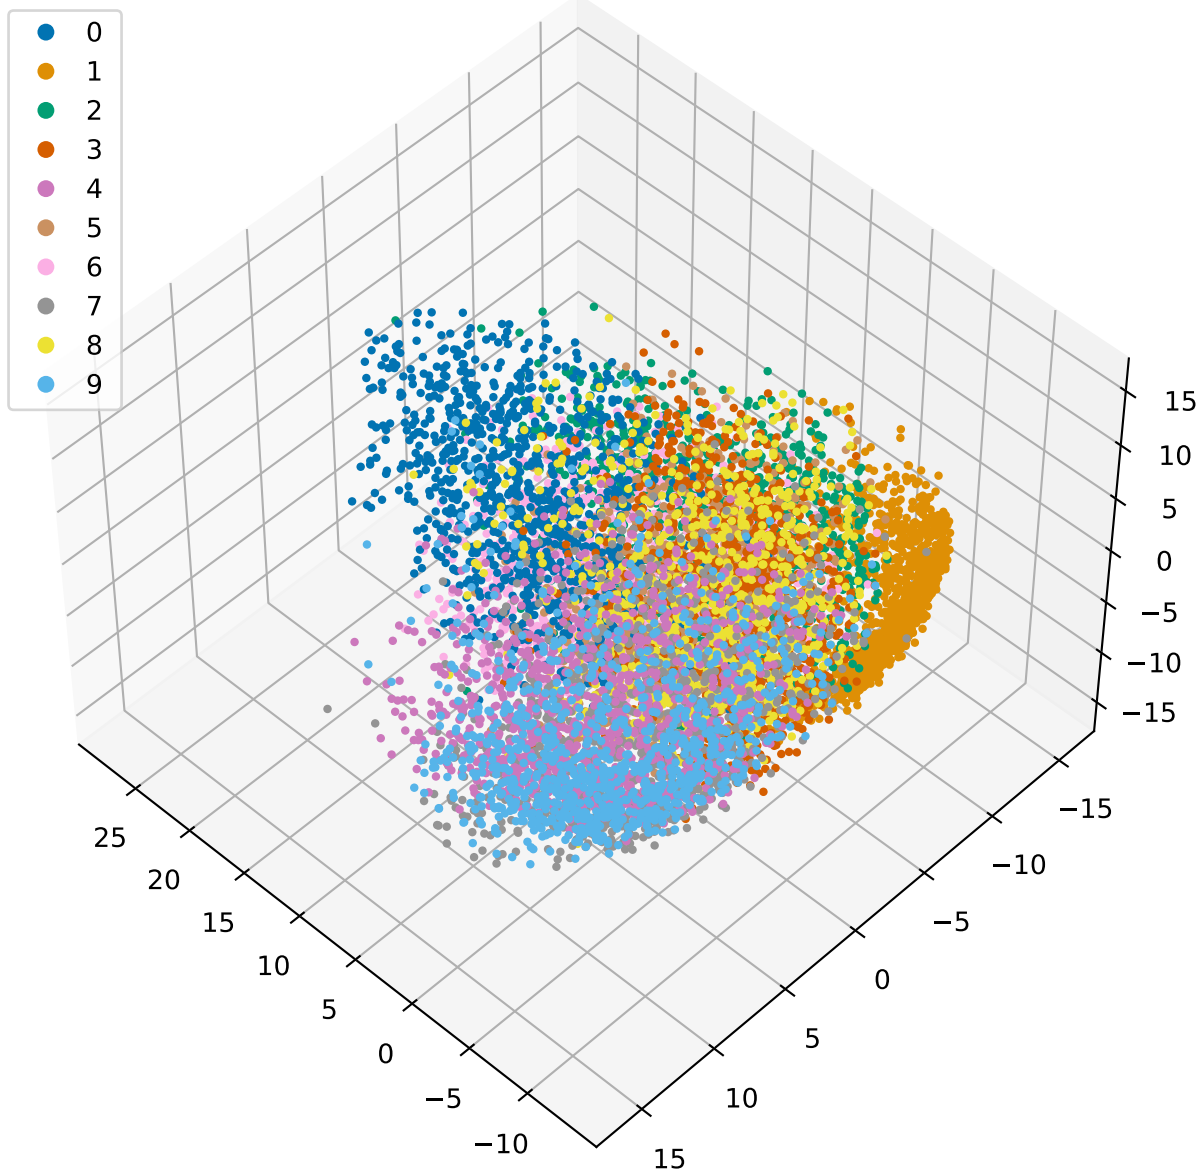

Supplement: Supplementary file 1 [file 361e5112d2eca09513bbd266e4b2d2be-Supplemental-Conference.zip › supplementary/results/CA results/hidden state viz/vitca/mnist/pca_mnist_3D.pdf]

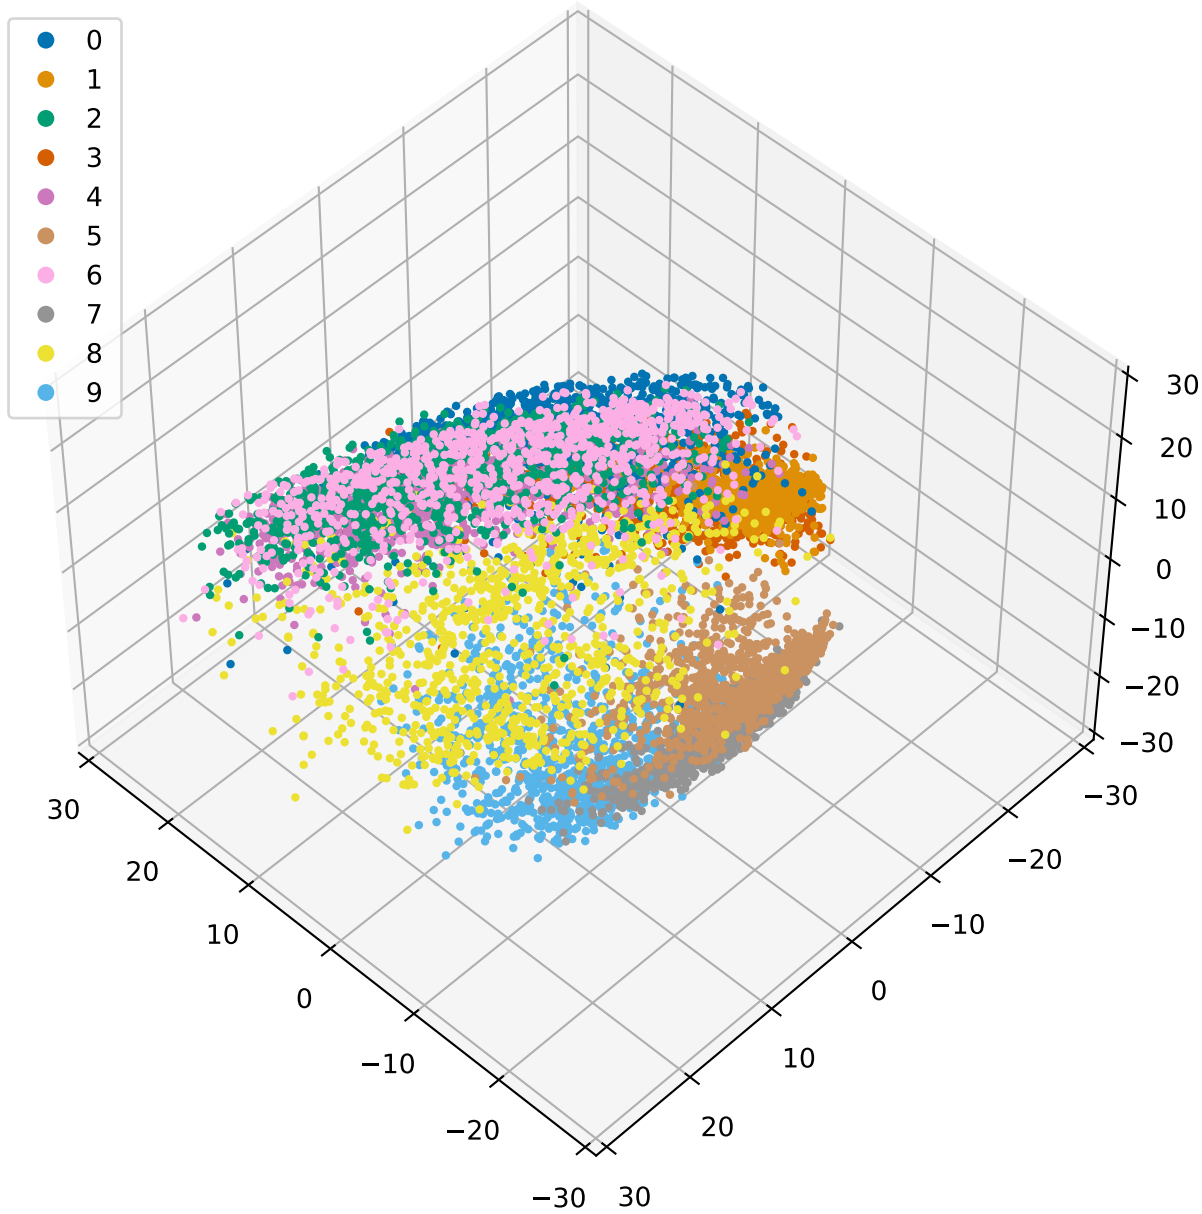

Supplement: Supplementary file 1 [file 361e5112d2eca09513bbd266e4b2d2be-Supplemental-Conference.zip › supplementary/results/CA results/hidden state viz/vitca/fashionmnist/pca_fashionmnist_3D.pdf]

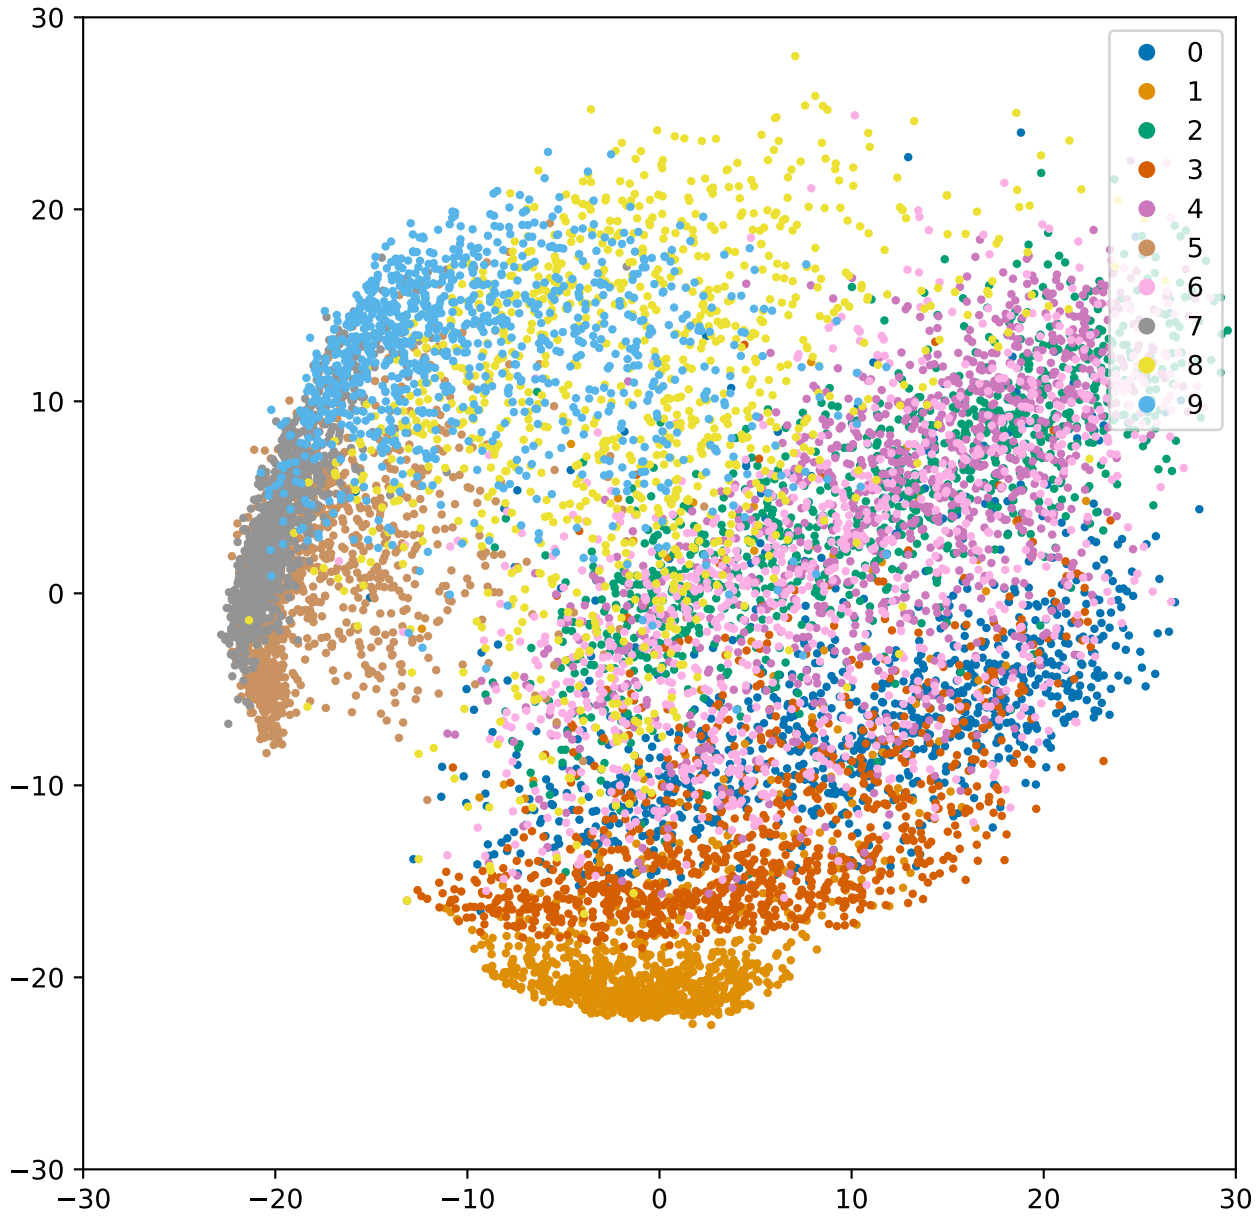

Supplement: Supplementary file 1 [file 361e5112d2eca09513bbd266e4b2d2be-Supplemental-Conference.zip › supplementary/results/CA results/hidden state viz/vitca/fashionmnist/pca_fashionmnist_2D.pdf]

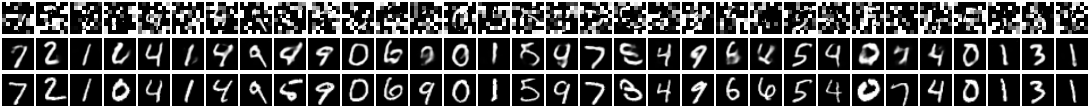

Supplement: Supplementary file 1 [file 361e5112d2eca09513bbd266e4b2d2be-Supplemental-Conference.zip › supplementary/results/non-CA results/unet/mnist/4x4/75%/imgs/output_001.png]

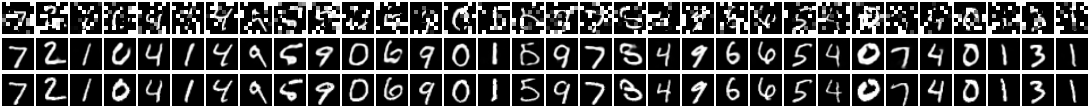

Supplement: Supplementary file 1 [file 361e5112d2eca09513bbd266e4b2d2be-Supplemental-Conference.zip › supplementary/results/non-CA results/unet/mnist/4x4/50%/imgs/output_001.png]

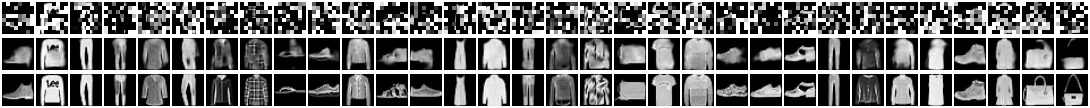

Supplement: Supplementary file 1 [file 361e5112d2eca09513bbd266e4b2d2be-Supplemental-Conference.zip › supplementary/results/non-CA results/unet/fashionmnist/4x4/75%/imgs/output_001.png]

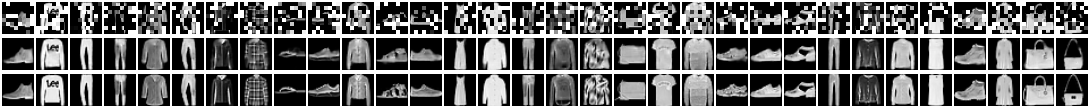

Supplement: Supplementary file 1 [file 361e5112d2eca09513bbd266e4b2d2be-Supplemental-Conference.zip › supplementary/results/non-CA results/unet/fashionmnist/4x4/50%/imgs/output_001.png]

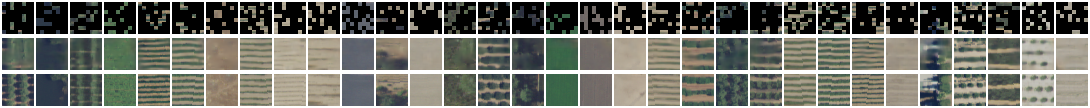

Supplement: Supplementary file 1 [file 361e5112d2eca09513bbd266e4b2d2be-Supplemental-Conference.zip › supplementary/results/non-CA results/unet/landcoverrep/4x4/75%/imgs/output_001.png]

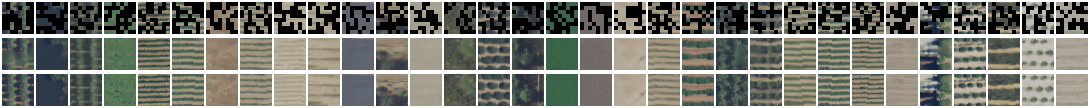

Supplement: Supplementary file 1 [file 361e5112d2eca09513bbd266e4b2d2be-Supplemental-Conference.zip › supplementary/results/non-CA results/unet/landcoverrep/4x4/50%/imgs/output_001.png]

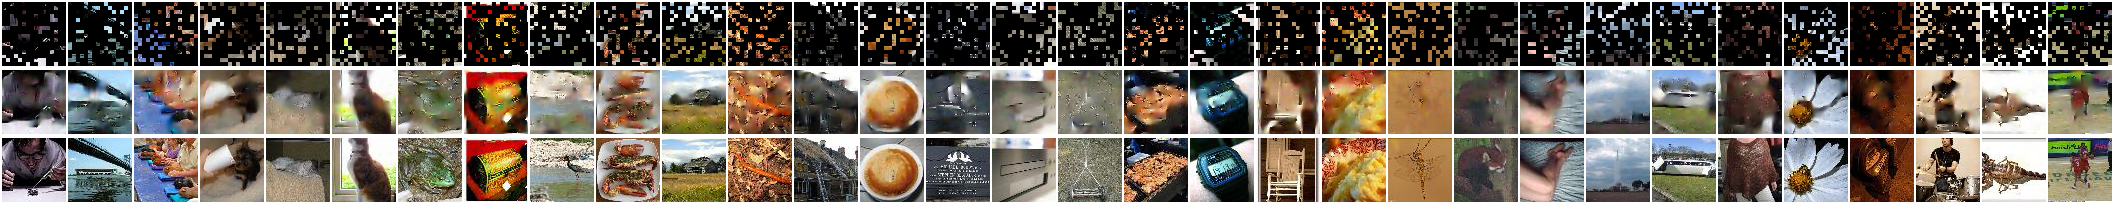

Supplement: Supplementary file 1 [file 361e5112d2eca09513bbd266e4b2d2be-Supplemental-Conference.zip › supplementary/results/non-CA results/unet/tinyimagenet/4x4/75%/imgs/output_001.png]

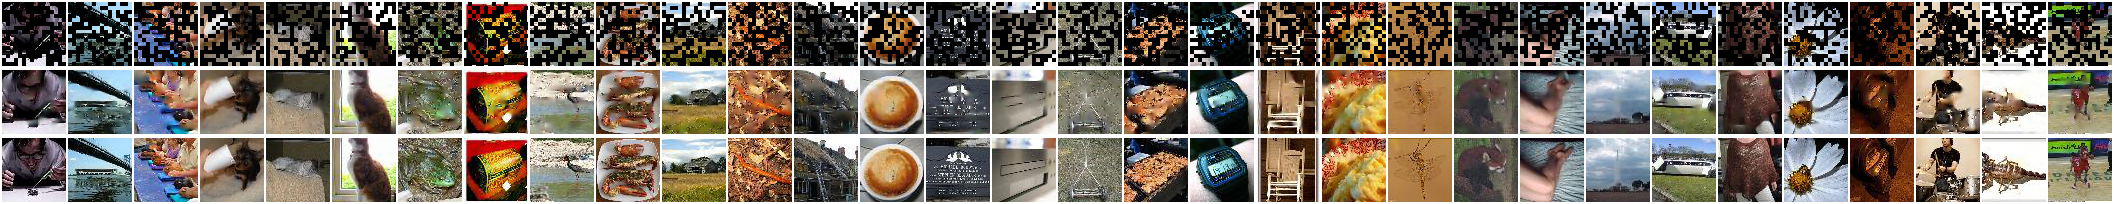

Supplement: Supplementary file 1 [file 361e5112d2eca09513bbd266e4b2d2be-Supplemental-Conference.zip › supplementary/results/non-CA results/unet/tinyimagenet/4x4/50%/imgs/output_001.png]

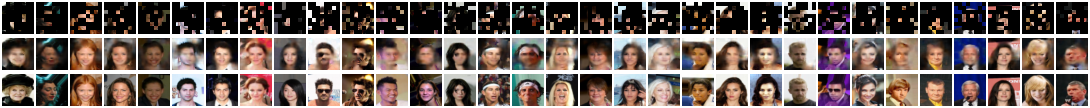

Supplement: Supplementary file 1 [file 361e5112d2eca09513bbd266e4b2d2be-Supplemental-Conference.zip › supplementary/results/non-CA results/unet/celeba/4x4/75%/imgs/output_001.png]

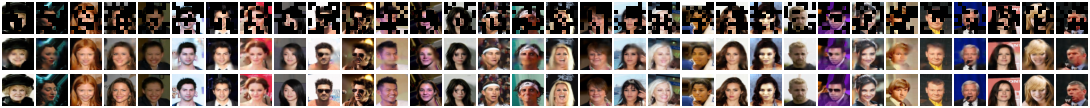

Supplement: Supplementary file 1 [file 361e5112d2eca09513bbd266e4b2d2be-Supplemental-Conference.zip › supplementary/results/non-CA results/unet/celeba/4x4/50%/imgs/output_001.png]

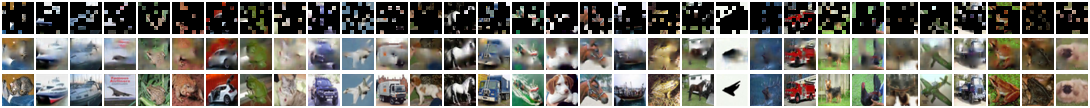

Supplement: Supplementary file 1 [file 361e5112d2eca09513bbd266e4b2d2be-Supplemental-Conference.zip › supplementary/results/non-CA results/unet/cifar10/4x4/75%/imgs/output_001.png]

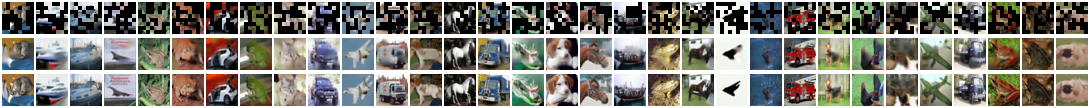

Supplement: Supplementary file 1 [file 361e5112d2eca09513bbd266e4b2d2be-Supplemental-Conference.zip › supplementary/results/non-CA results/unet/cifar10/4x4/50%/imgs/output_001.png]

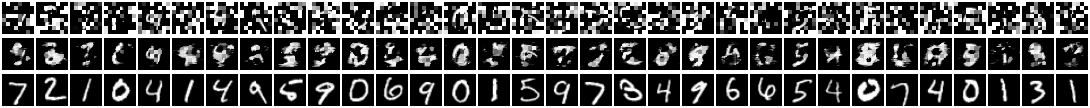

Supplement: Supplementary file 1 [file 361e5112d2eca09513bbd266e4b2d2be-Supplemental-Conference.zip › supplementary/results/non-CA results/vit/mnist/4x4/75%/imgs/output_001.png]

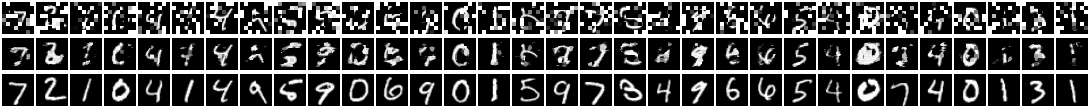

Supplement: Supplementary file 1 [file 361e5112d2eca09513bbd266e4b2d2be-Supplemental-Conference.zip › supplementary/results/non-CA results/vit/mnist/4x4/50%/imgs/output_001.png]

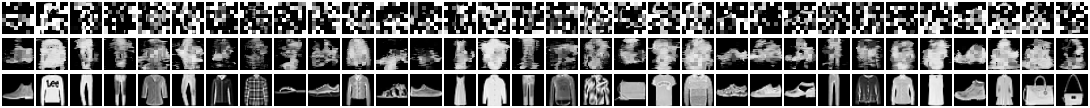

Supplement: Supplementary file 1 [file 361e5112d2eca09513bbd266e4b2d2be-Supplemental-Conference.zip › supplementary/results/non-CA results/vit/fashionmnist/4x4/75%/imgs/output_001.png]

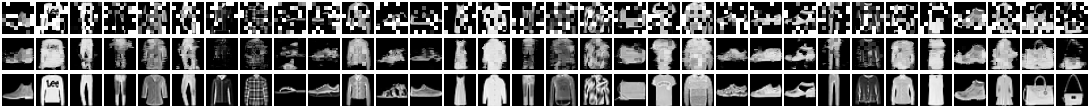

Supplement: Supplementary file 1 [file 361e5112d2eca09513bbd266e4b2d2be-Supplemental-Conference.zip › supplementary/results/non-CA results/vit/fashionmnist/4x4/50%/imgs/output_001.png]

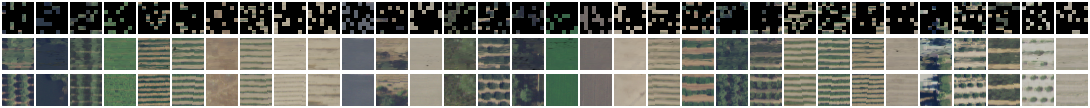

Supplement: Supplementary file 1 [file 361e5112d2eca09513bbd266e4b2d2be-Supplemental-Conference.zip › supplementary/results/non-CA results/vit/landcoverrep/4x4/75%/imgs/output_001.png]

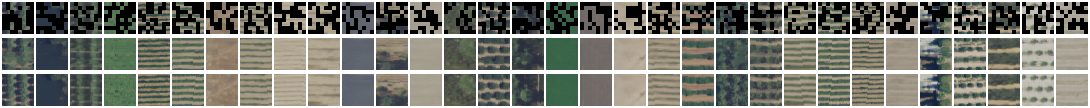

Supplement: Supplementary file 1 [file 361e5112d2eca09513bbd266e4b2d2be-Supplemental-Conference.zip › supplementary/results/non-CA results/vit/landcoverrep/4x4/50%/imgs/output_001.png]

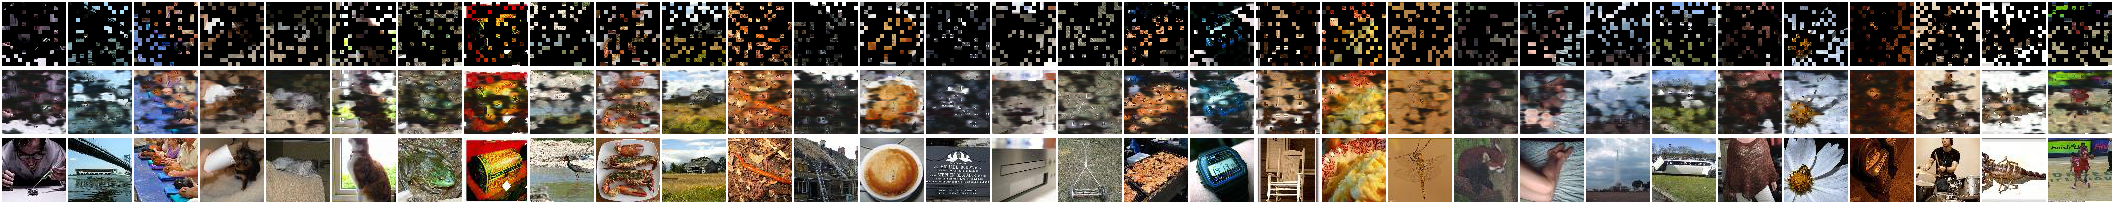

Supplement: Supplementary file 1 [file 361e5112d2eca09513bbd266e4b2d2be-Supplemental-Conference.zip › supplementary/results/non-CA results/vit/tinyimagenet/4x4/75%/imgs/output_001.png]

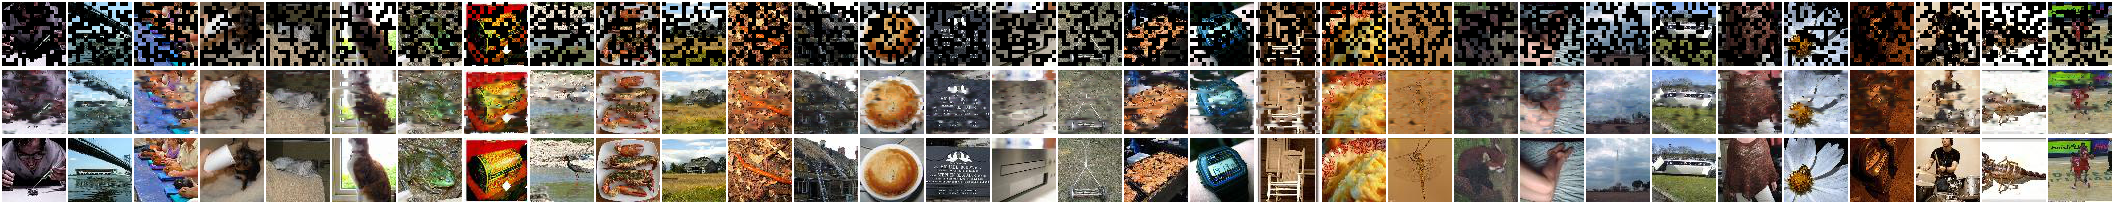

Supplement: Supplementary file 1 [file 361e5112d2eca09513bbd266e4b2d2be-Supplemental-Conference.zip › supplementary/results/non-CA results/vit/tinyimagenet/4x4/50%/imgs/output_001.png]

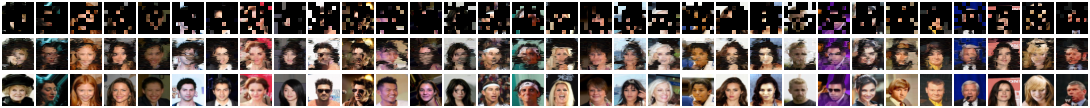

Supplement: Supplementary file 1 [file 361e5112d2eca09513bbd266e4b2d2be-Supplemental-Conference.zip › supplementary/results/non-CA results/vit/celeba/4x4/75%/imgs/output_001.png]

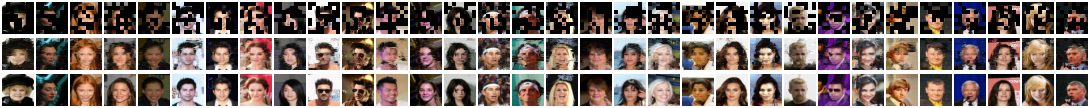

Supplement: Supplementary file 1 [file 361e5112d2eca09513bbd266e4b2d2be-Supplemental-Conference.zip › supplementary/results/non-CA results/vit/celeba/4x4/50%/imgs/output_001.png]

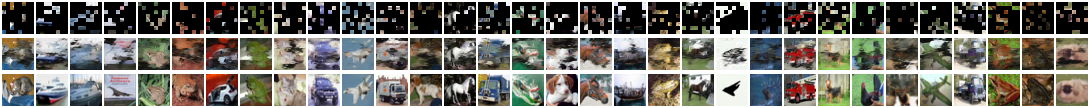

Supplement: Supplementary file 1 [file 361e5112d2eca09513bbd266e4b2d2be-Supplemental-Conference.zip › supplementary/results/non-CA results/vit/cifar10/4x4/75%/imgs/output_001.png]

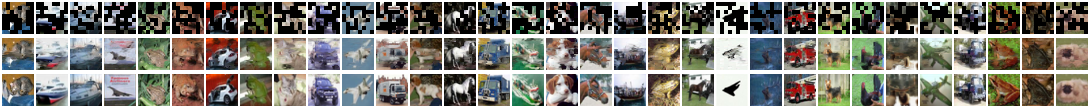

Supplement: Supplementary file 1 [file 361e5112d2eca09513bbd266e4b2d2be-Supplemental-Conference.zip › supplementary/results/non-CA results/vit/cifar10/4x4/50%/imgs/output_001.png]
